# Supplementary material for: Whole-Brain c-Fos Connectomics Reveals Biphasic Integration-Distribution Architecture in Valence-Specific Emotional Processing
Source: Research Square preprint supplement (doi:10.21203/rs.3.rs-7794939/v1), 2025-11-14
Supplement: Supplementary file 1 [file b9b966fbec58ca615365ce42.docx]

**Supplementary Information for**

**Whole-Brain c-Fos Connectomics Reveals Biphasic Integration-Distribution Architecture in Valence-Specific Emotional Processing**

Hanglei Lin1,*, Mingyi Huang2,*, Ningyuan Fu1,*, Jinsen Xi1,*, Kaiying Zhang1, Yuanjun Yang1, Zonglei Zhou 3,#, Zhili Huang4,5,#, Yuguo Yu2,5,6,#, Xiangshan Yuan1,5,#

1 Department of Anatomy and Histoembryology, School of Basic Medical Sciences, Fudan University, Shanghai, China;

2 Research Institute of Intelligent Complex Systems, Institute of Science and Technology for Brain-Inspired Intelligence, Fudan University, Shanghai, China;

3 Center for Medical Research and Innovation and Pudong Medical Center, Shanghai Pudong Hospital, Fudan University, Shanghai, China

4 Department of Pharmacology, School of Basic Medical Sciences, Fudan University, Shanghai, China;

5 State Key Laboratory of Medical Neurobiology, Institutes of Brain Science and Collaborative Innovation Center for Brain Science, Fudan University, Shanghai, China;

6 Shanghai Artificial Intelligence Laboratory, Shanghai, China.

* These authors contributed equally to this work.

# Corresponding author. Email: [zonglei_zhou@fudan.edu.cn](mailto:zonglei_zhou@fudan.edu.cn) (Zonglei Zhou); [huangzl@fudan.edu.cn](mailto:huangzl@fudan.edu.cn) (Zhili Huang); [yuyuguo@fudan.edu.cn](mailto:yuyuguo@fudan.edu.cn) (Yuguo Yu); [yuanxiangshan1999@163.com](mailto:yuanxiangshan1999@163.com) (Xiangshan Yuan);


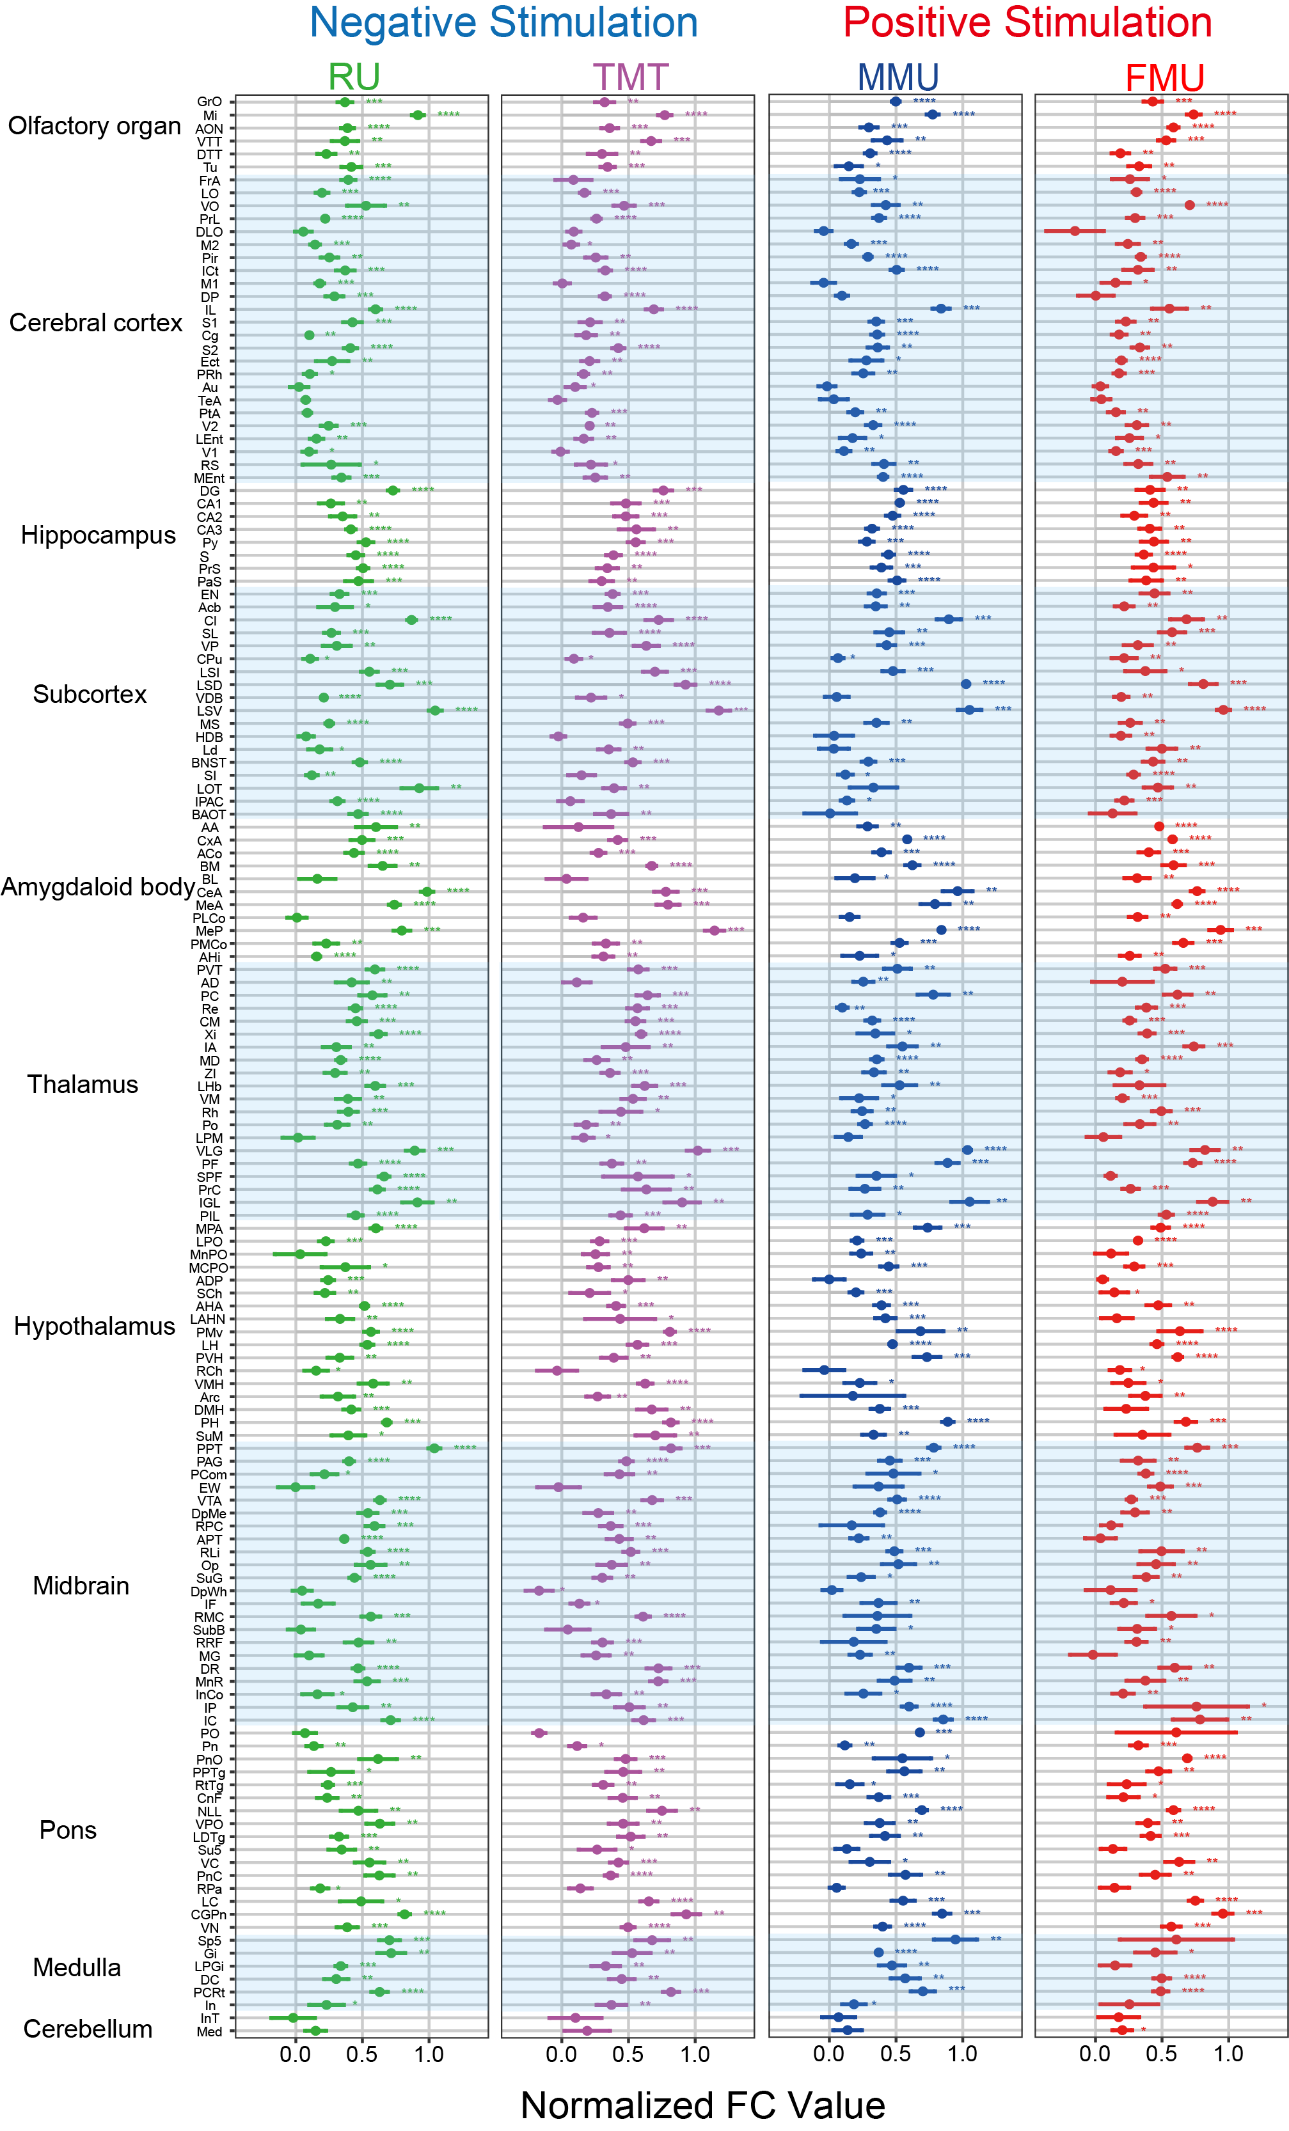


**Supplementary Figure 1. Distinct emotional stimuli induce c-Fos expression in the whole brain.**

Comparative analysis of c-Fos expression across 150 distinct nuclei relative to the control group. The Normalized FC Values represent the normalized levels of c-Fos expression within each experimental group. Statistical significance was determined using t-test analysis across the five experimental groups (*P < 0.05, **P < 0.01, ***P < 0.001, ****P < 0.0001), with n = 5 per group. The nuclei are systematically categorized into major anatomical subdivisions, which are indicated on the left side of the graph. MMU: Male mouse urine, FMU: Female mouse urine, RU: Rat urine.

**Supplementary Data 1.** Raw data and calculated Normalized FC Values for each group.

**
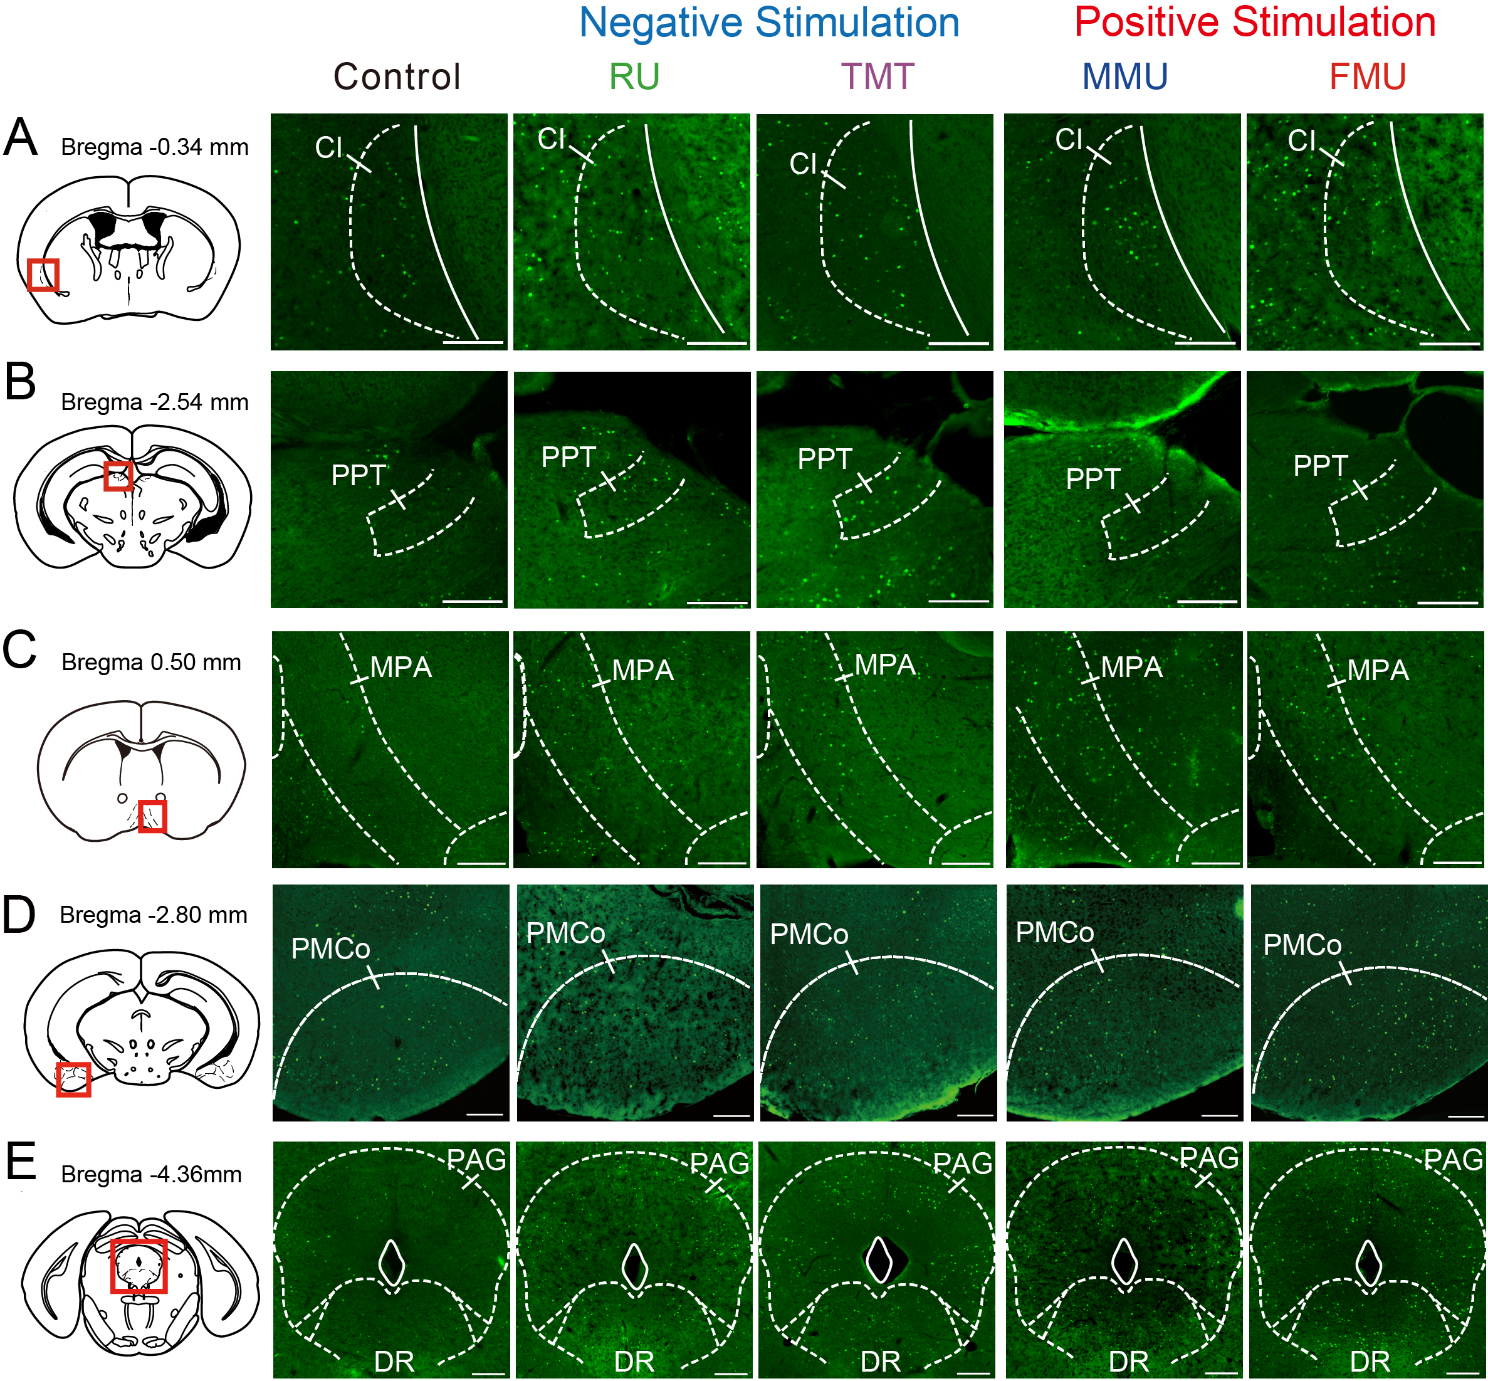
**

**Supplementary Figure 2. Representative c-Fos expression in shared and stimulus-specific nuclei.**

Panels show c-Fos expression under different emotional stimuli. (A-C) Nuclei co-activated by both positive and negative stimuli: A. Cl; B. PMV; C. PPT. (D-F) Nuclei selectively activated by individual stimuli: D. MPA (MMU); E. PMCo (FMU); F. DR and PAG (TMT). Scale bar = 200 μm.


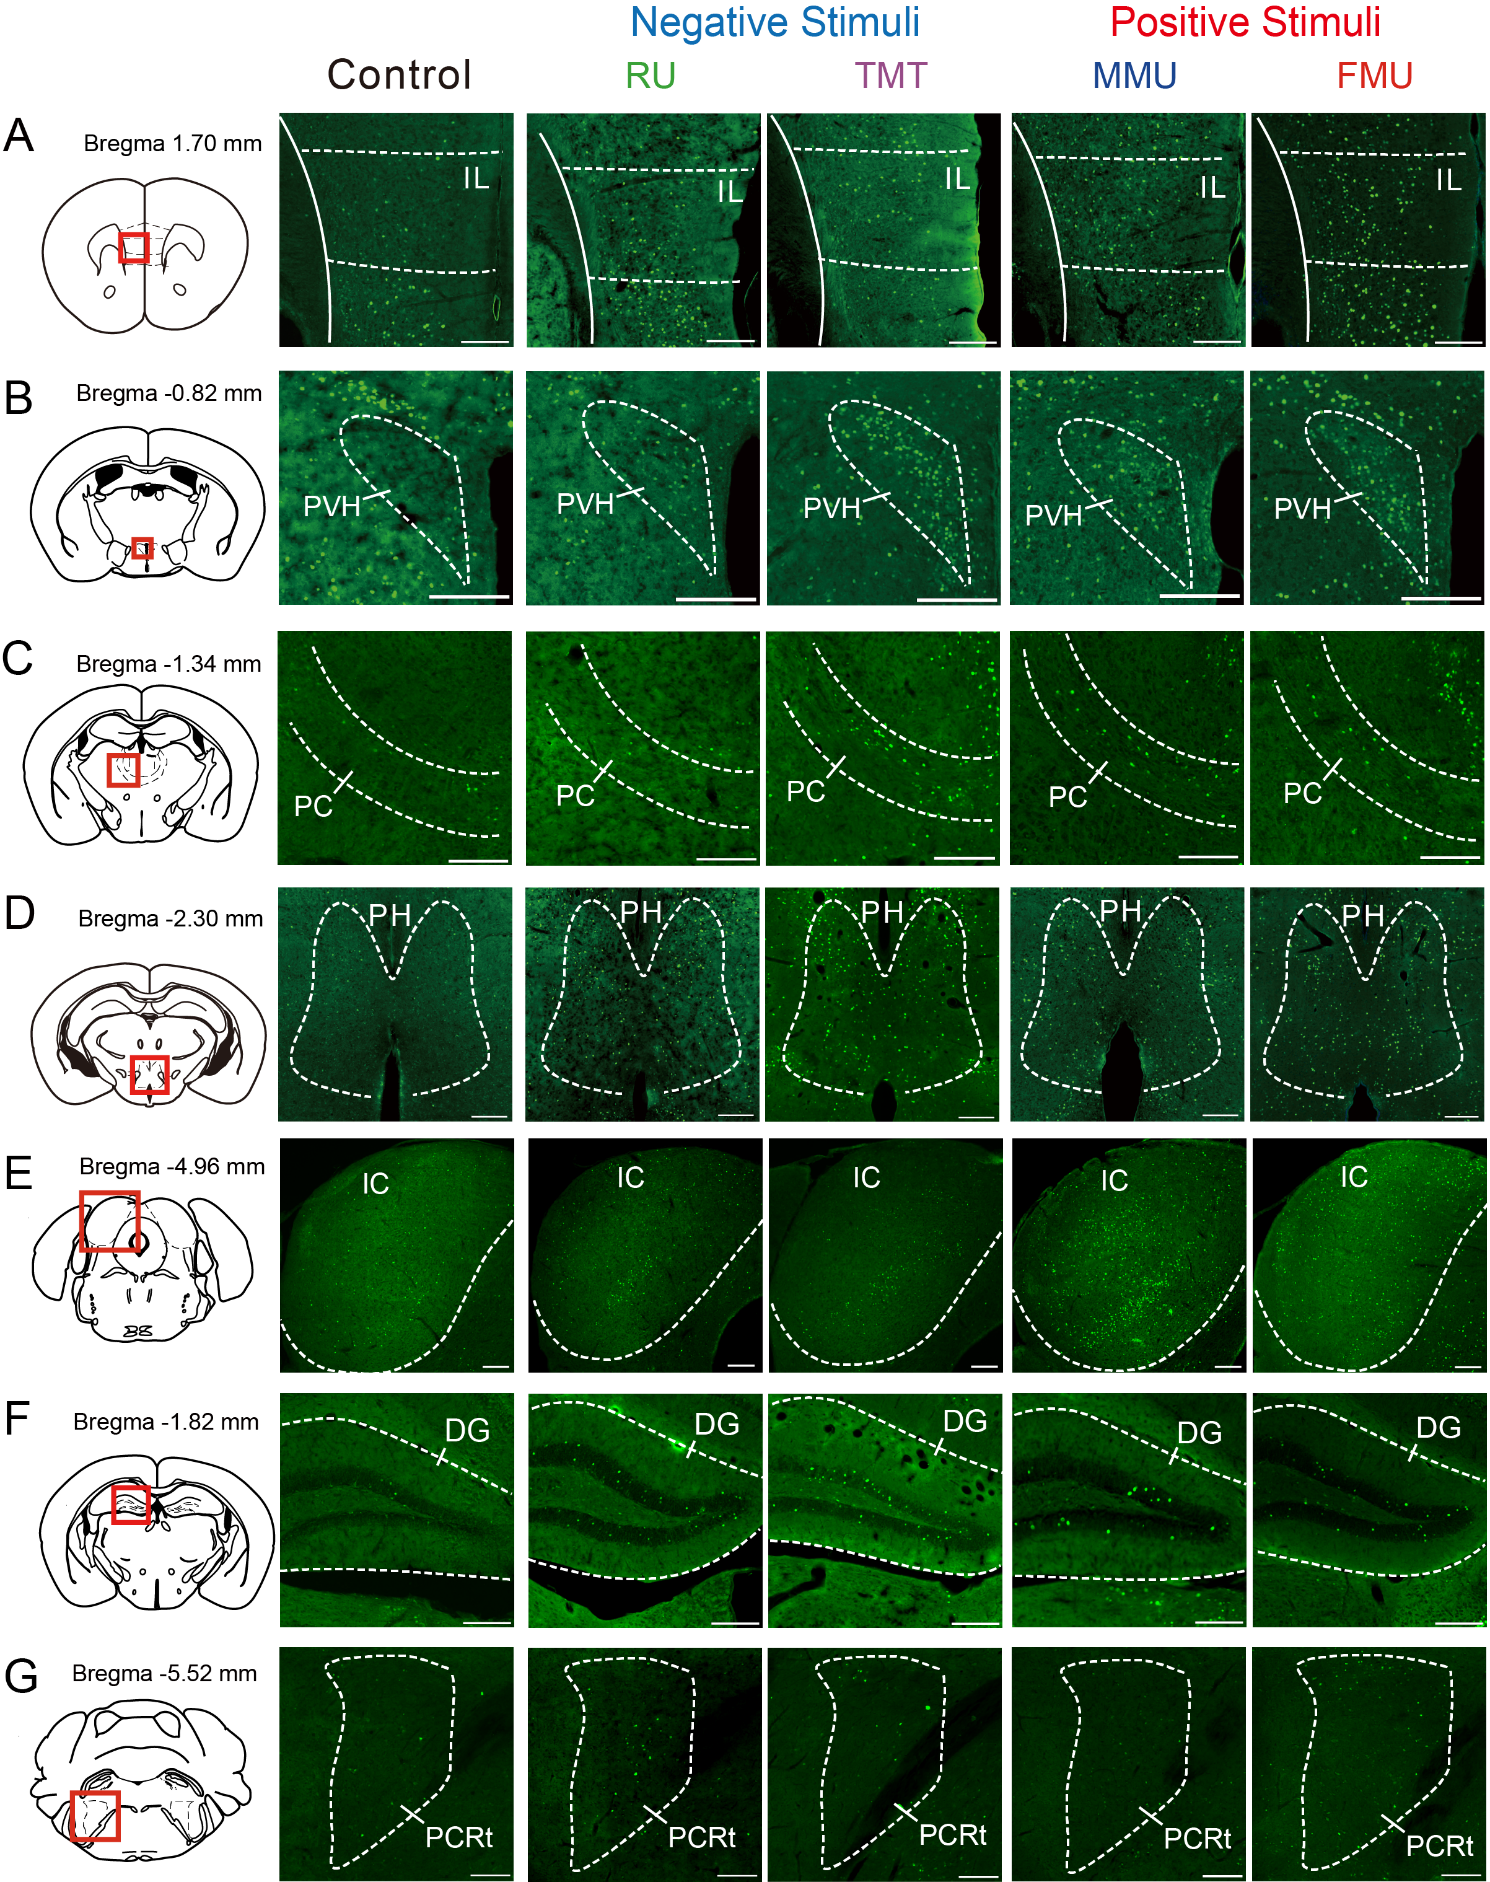


**Supplementary Figure 3. Representative c-Fos expression in nuclei selectively activated by either negative or positive stimuli.**

Fluorescent immunohistochemistry images show c-Fos expression under different emotional stimuli. (A-E). Nuclei significantly activated by positive stimuli (MMU & FMU): A. IL; B. PVH; C. PC; D. PH; E. IC. (F-G). Nuclei significantly activated by negative stimuli (RU & TMT): F. DG; G. PCRt. Bregma coordinates are indicated for each brain region. Scale bar = 200 μm.

**
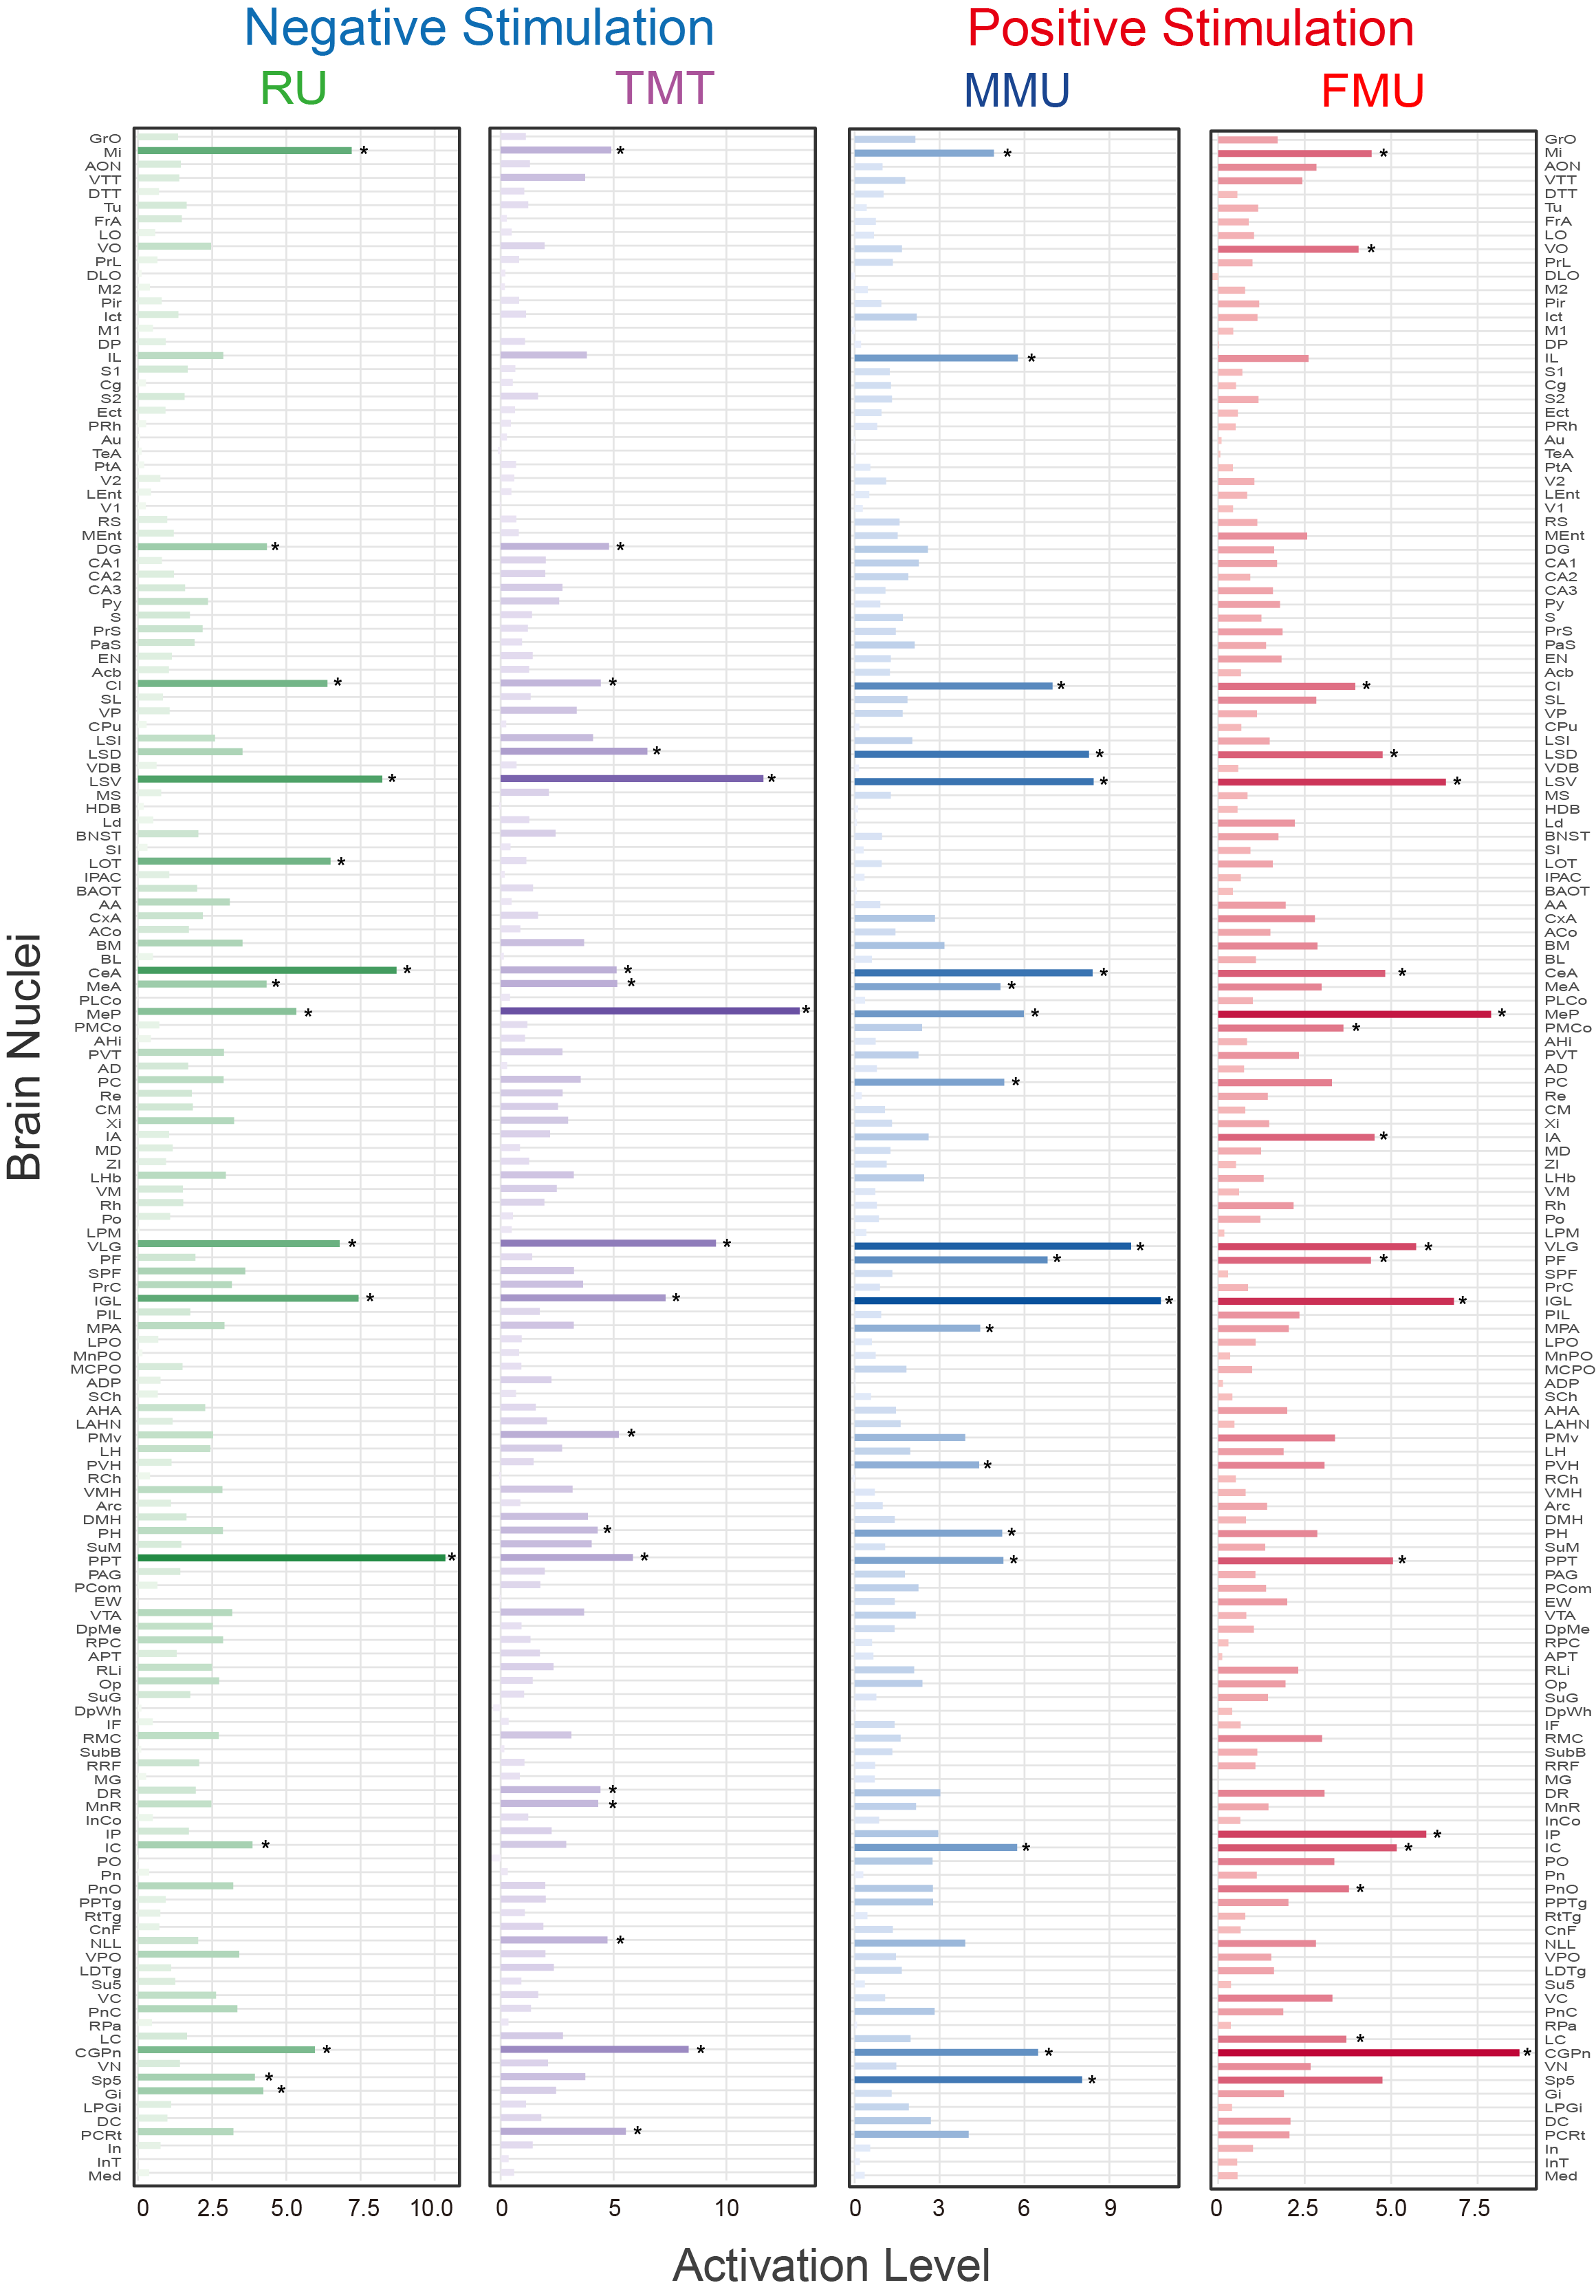
**

**Supplementary Figure 4. Brain activation patterns across four experimental conditions.**

Each panel shows the activation levels of brain regions under one of the four stimuli: RU (green), TMT (purple), MMU (blue), and FMU (red). Activation level is quantified by the activation ratio relative to control. Brain regions showing significant activation (R > μ + σ) are marked with asterisks (*). MMU: Male mouse urine; FMU: Female mouse urine; RU: Rat urine; TMT: 2,4,5-trimethylthiazoline (fox odor).

**
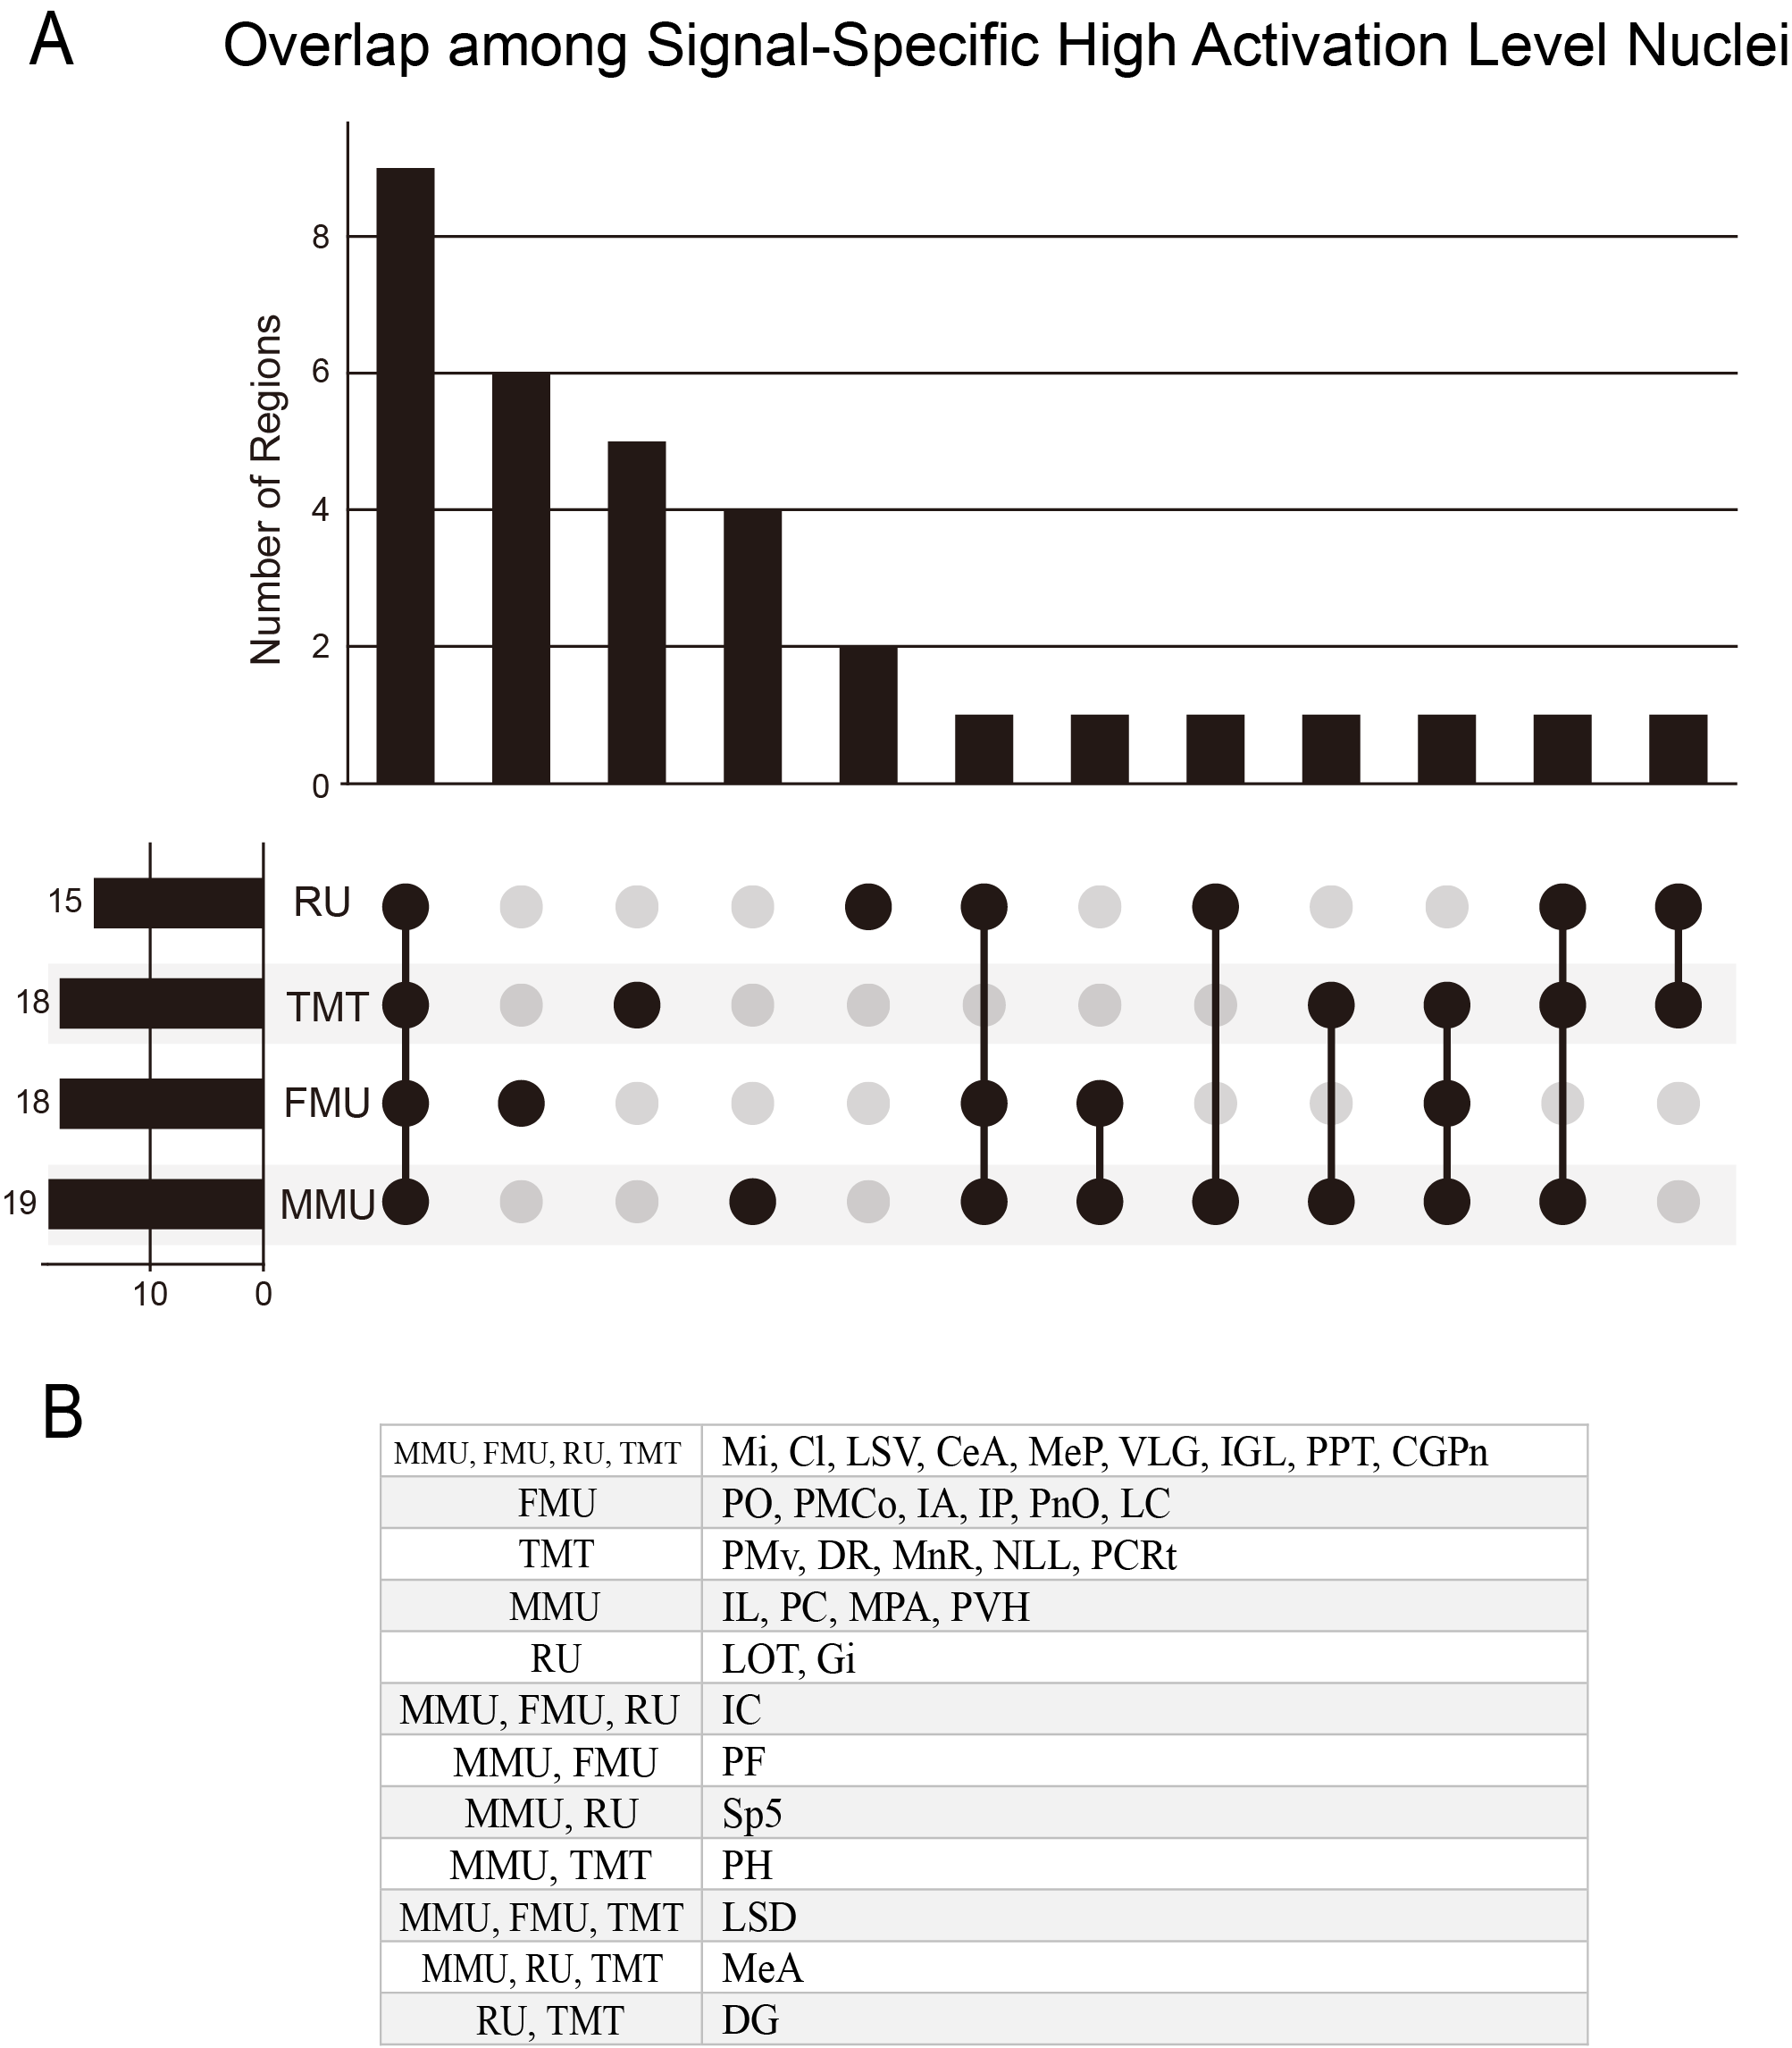
**

**Supplementary Figure 5. Overlap analysis of significantly activated brain regions across four emotion-inducing conditions.**

This figure illustrates the overlap of high activation level nuclei identified under four distinct emotional stimuli. (A) The upper bar chart shows the number of overlapping regions for each combination of conditions; the central matrix highlights the corresponding condition sets; (B) The lower table lists the specific nuclei associated with each overlap.

**
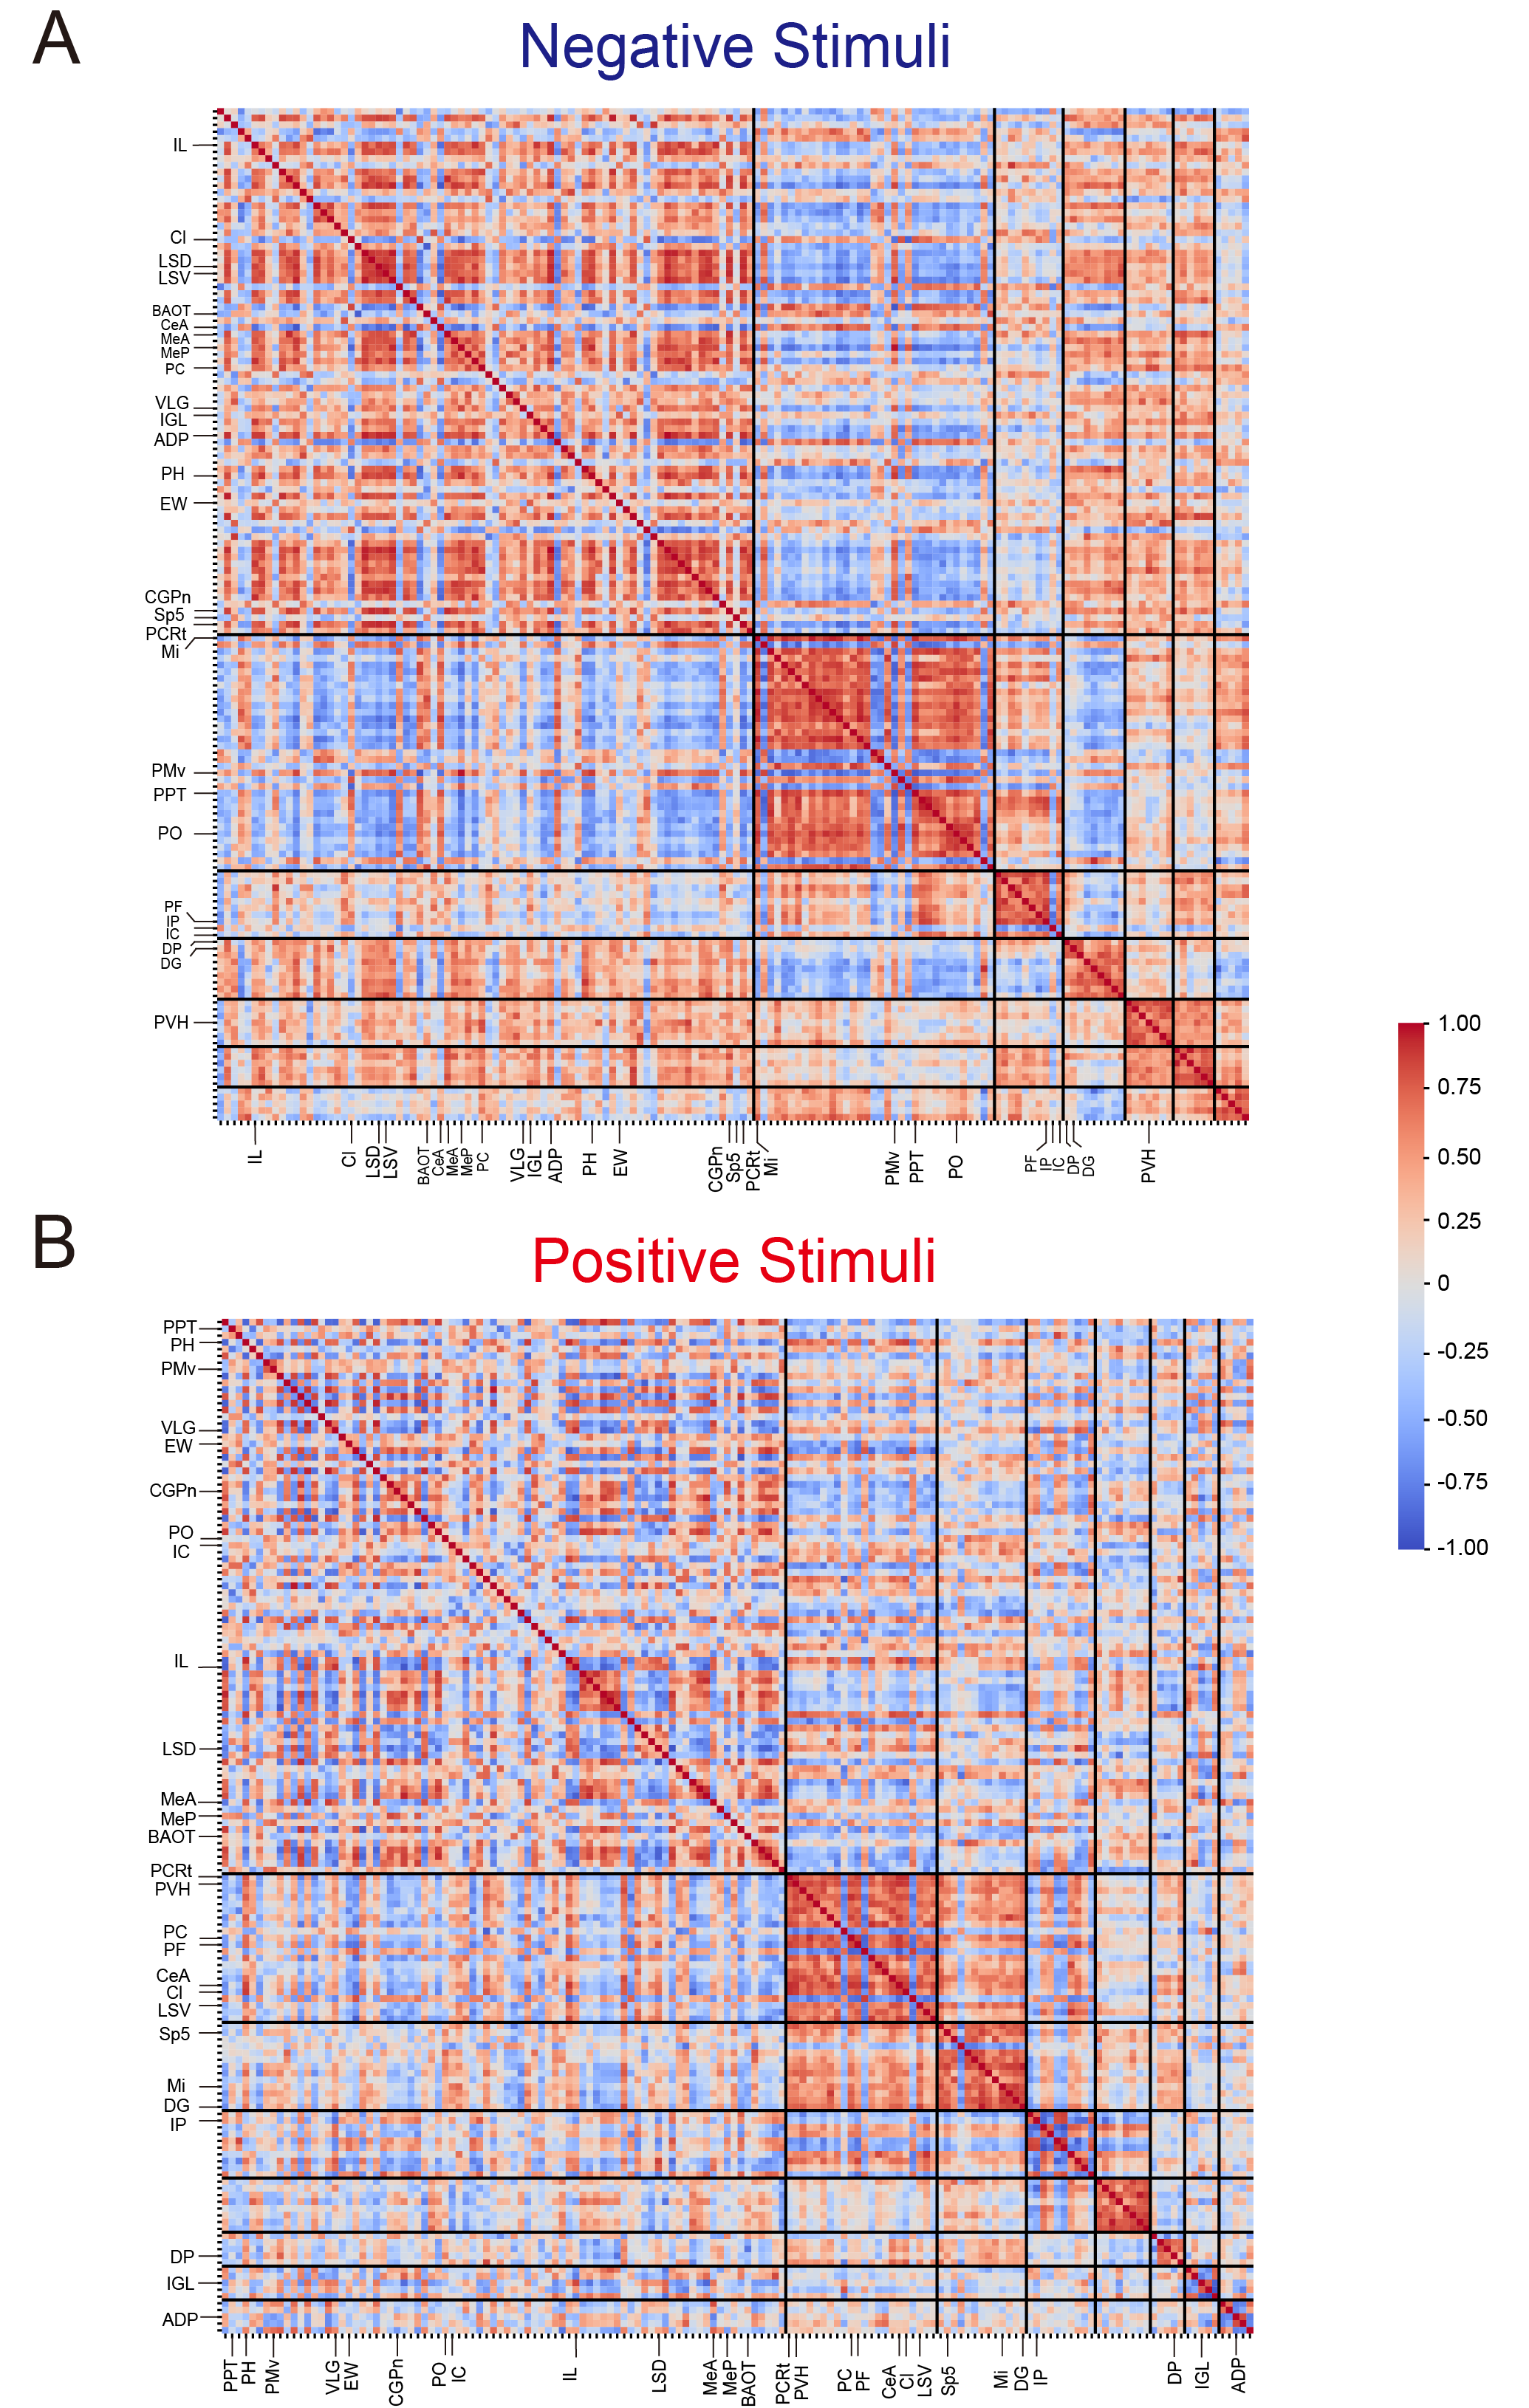
**

**Supplementary Figure 6. Correlation structure of activated nuclei under emotional stimuli.**

Correlation matrices of significantly activated brain regions under negative (A) and positive (B) stimuli. Brain nuclei are ordered by community identity, and community boundaries are outlined in black. Color indicates correlation strength (blue: negative, red: positive).

**
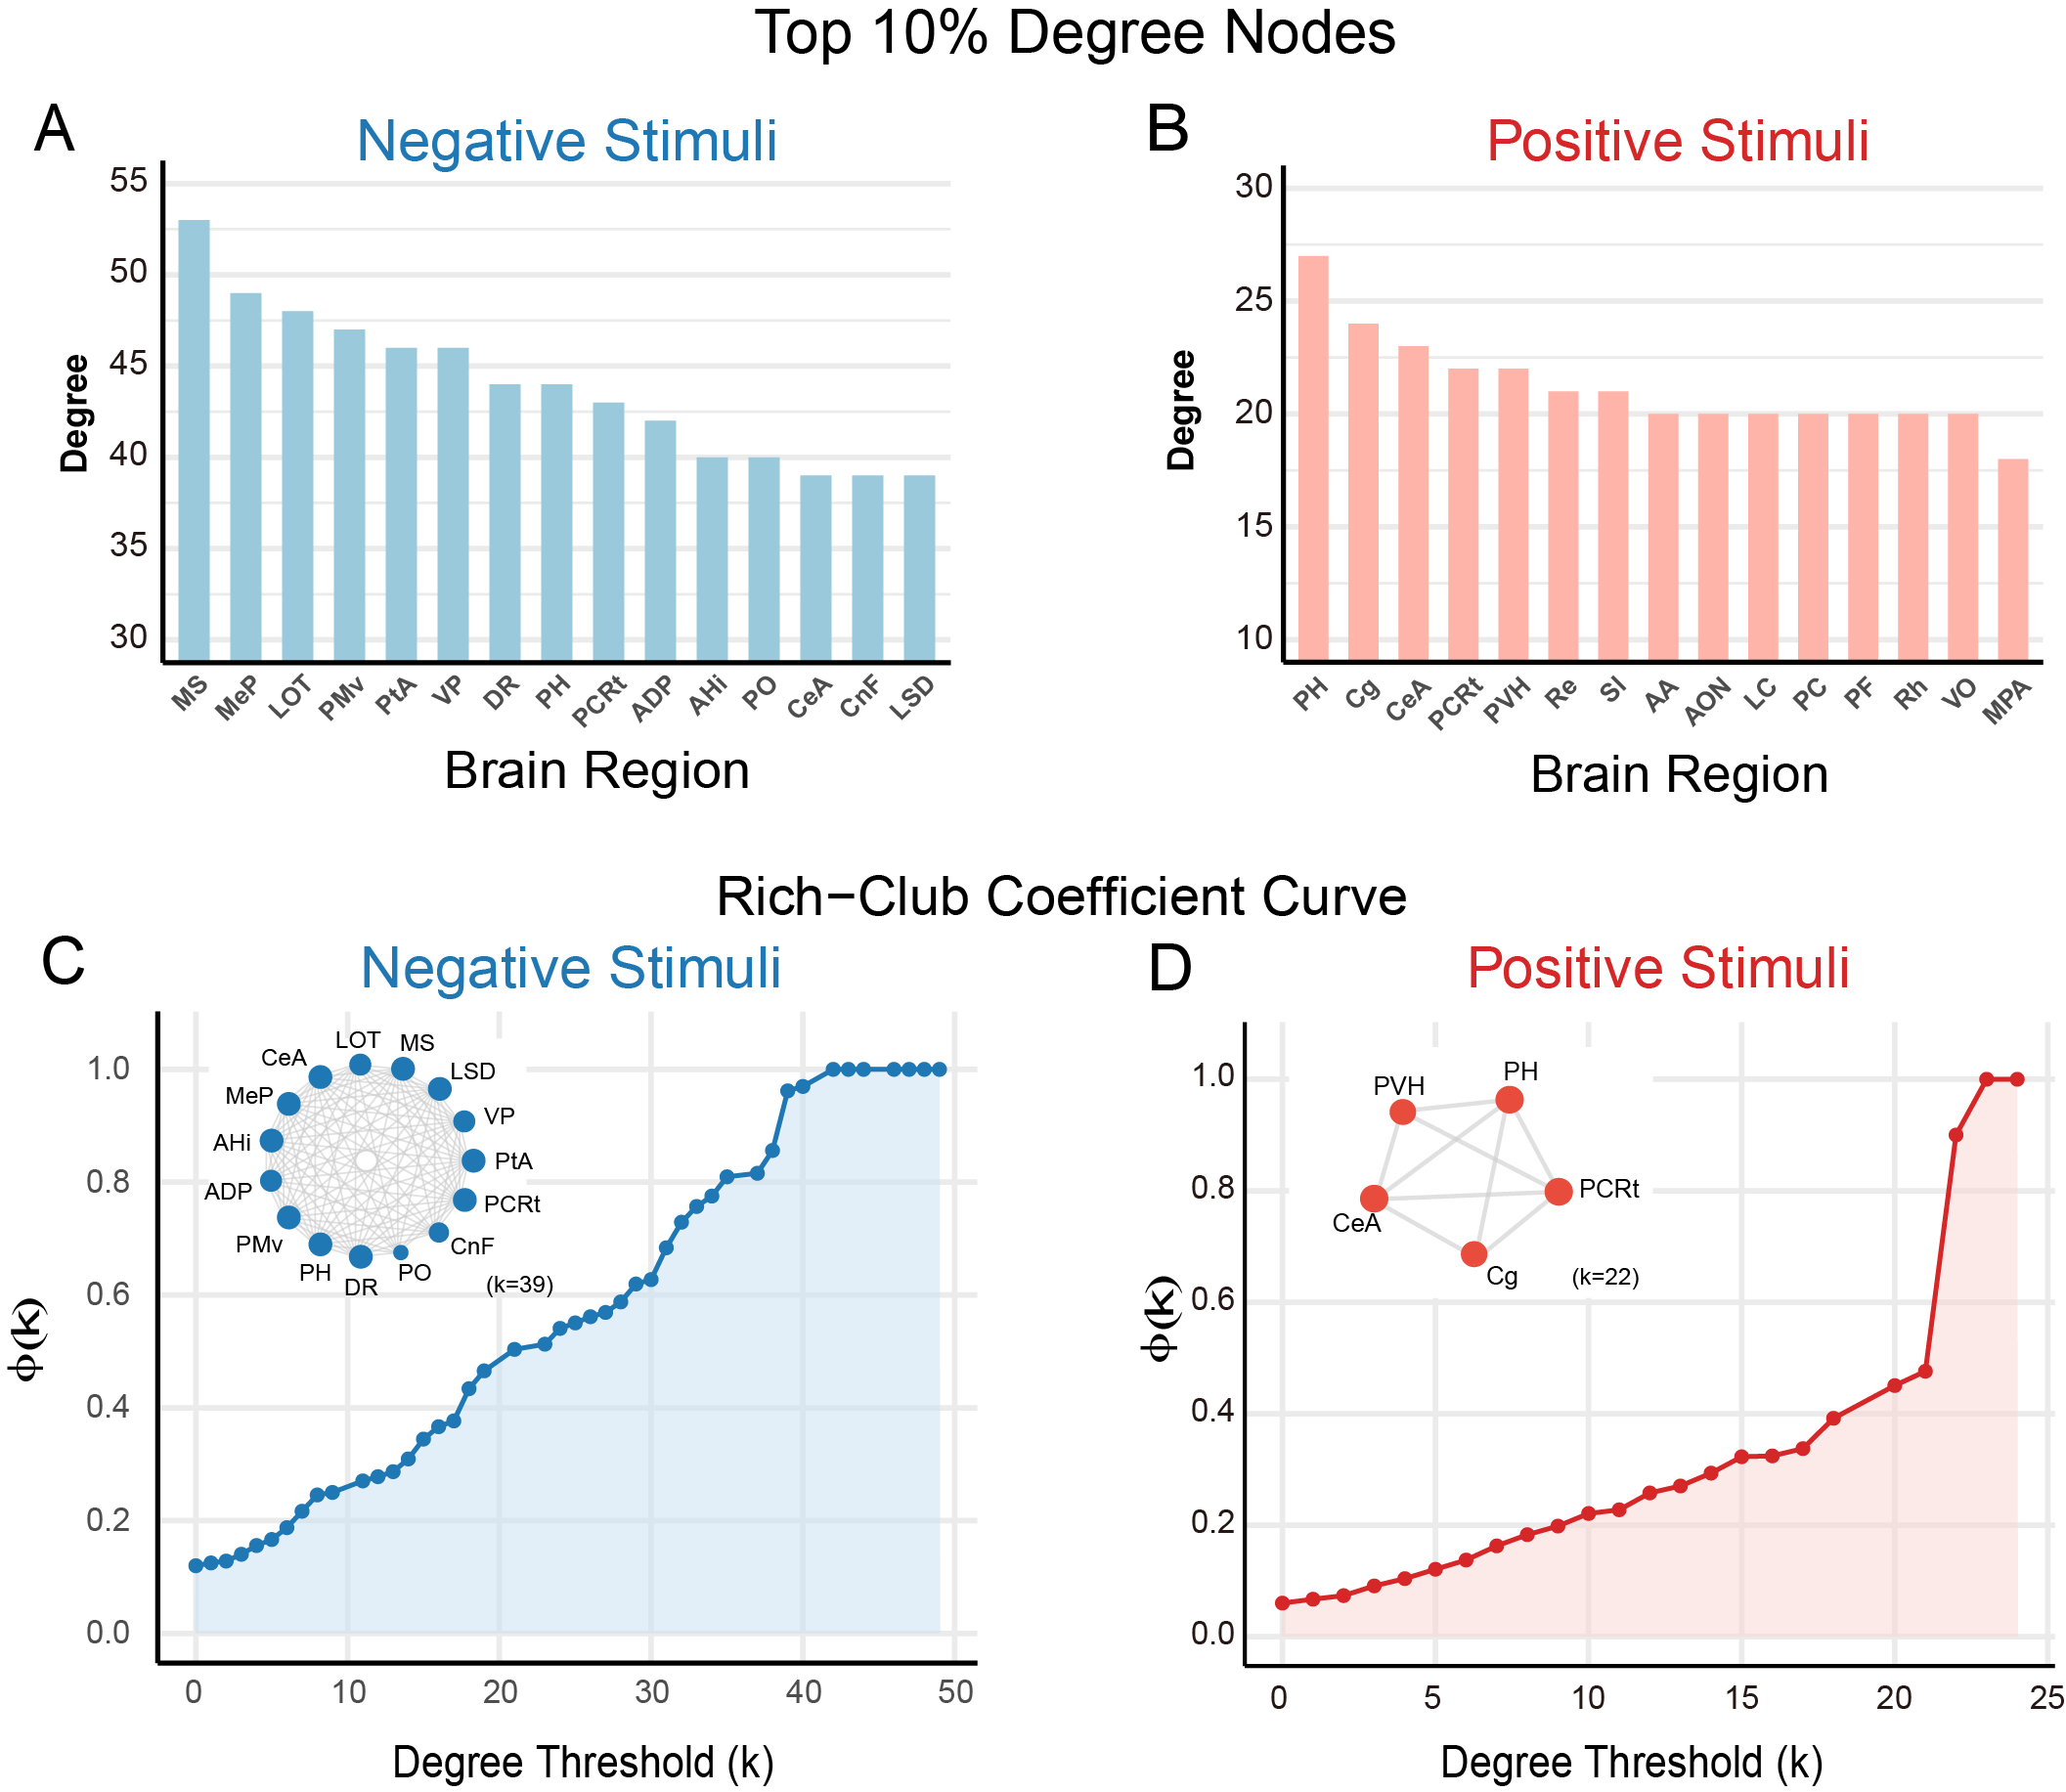
**

**Supplementary Figure 7. Topological features of emotion-responsive brain networks.**

**(A-B)** Bar plots show the top 10% highest-degree brain nuclei under negative (A) and positive (B) stimuli. **(C-D)** Rich-club coefficient curves (φ(k)) under negative (C) and positive (D) conditions. Insets display the rich-club subnetworks extracted at key degree thresholds (negative: *k* = 39; positive: *k* = 22).


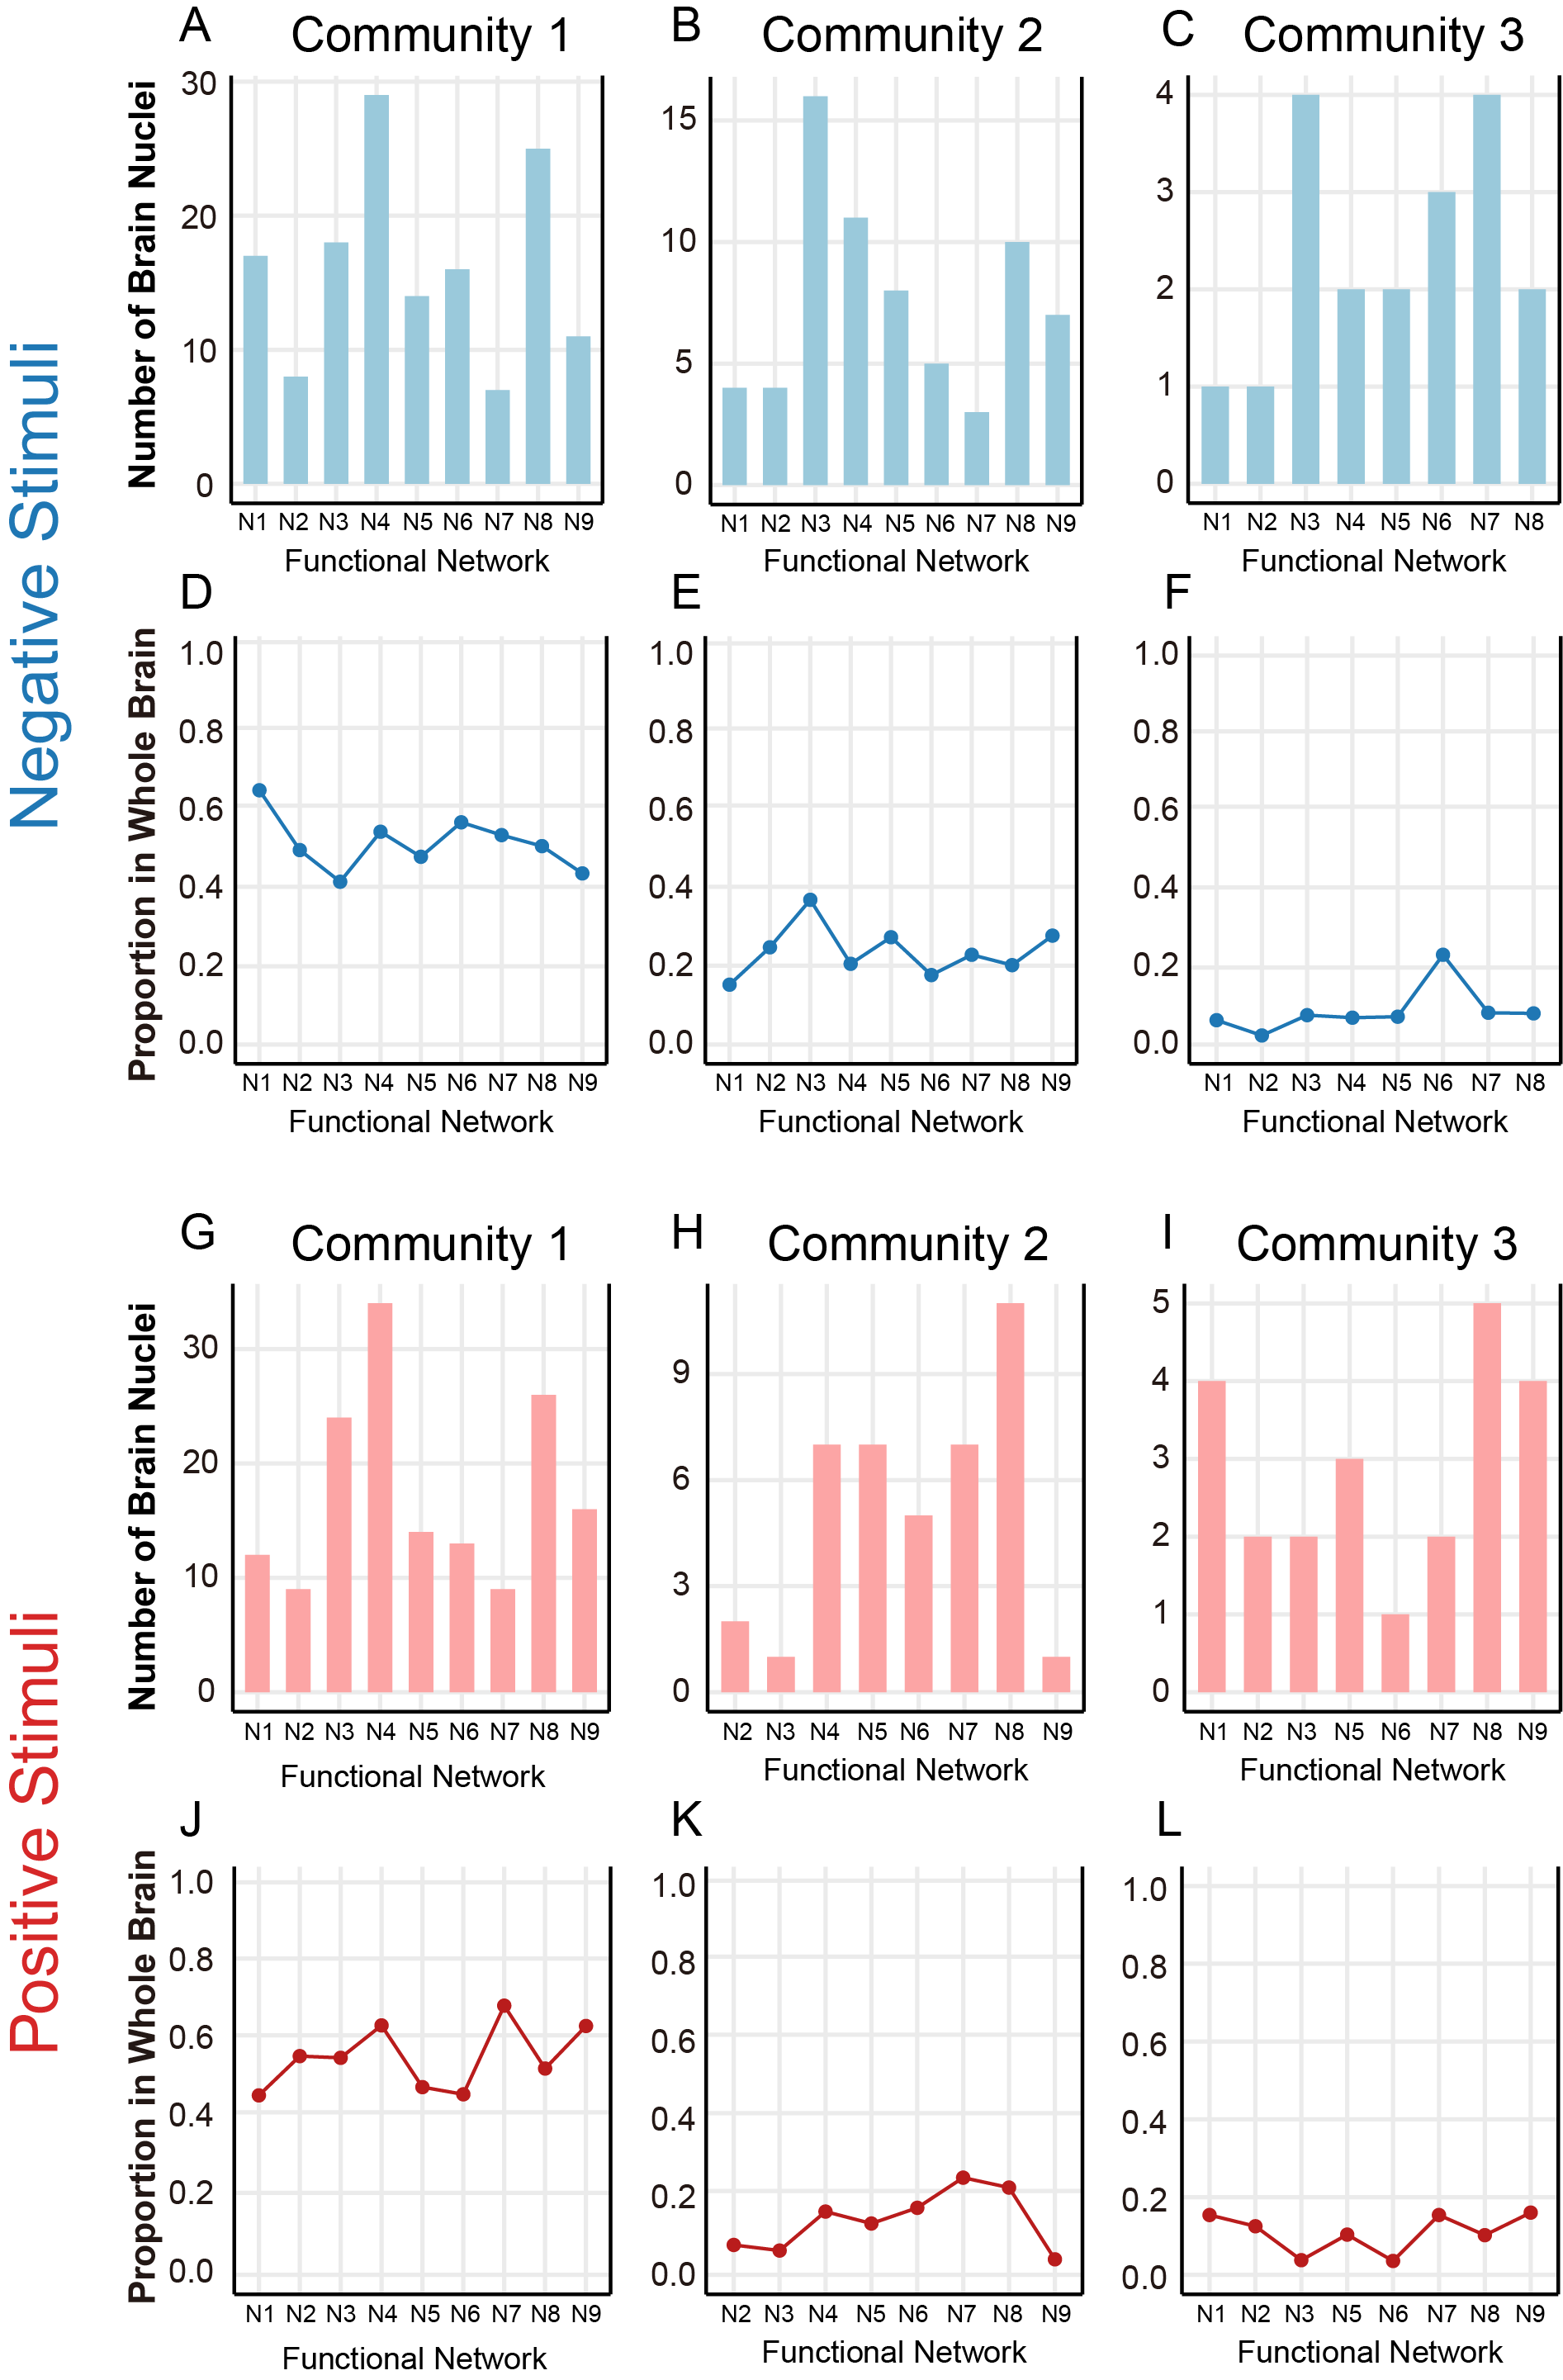


**Supplementary Figure 8. Functional network composition of the top three communities under negative (A-F) and positive (G-L) stimuli.** Bar plots indicate the number of nuclei from each functional network contained in each community (A-C, G-I). Line plots represent the fraction of each functional network covered by the community (D-F, J-L).


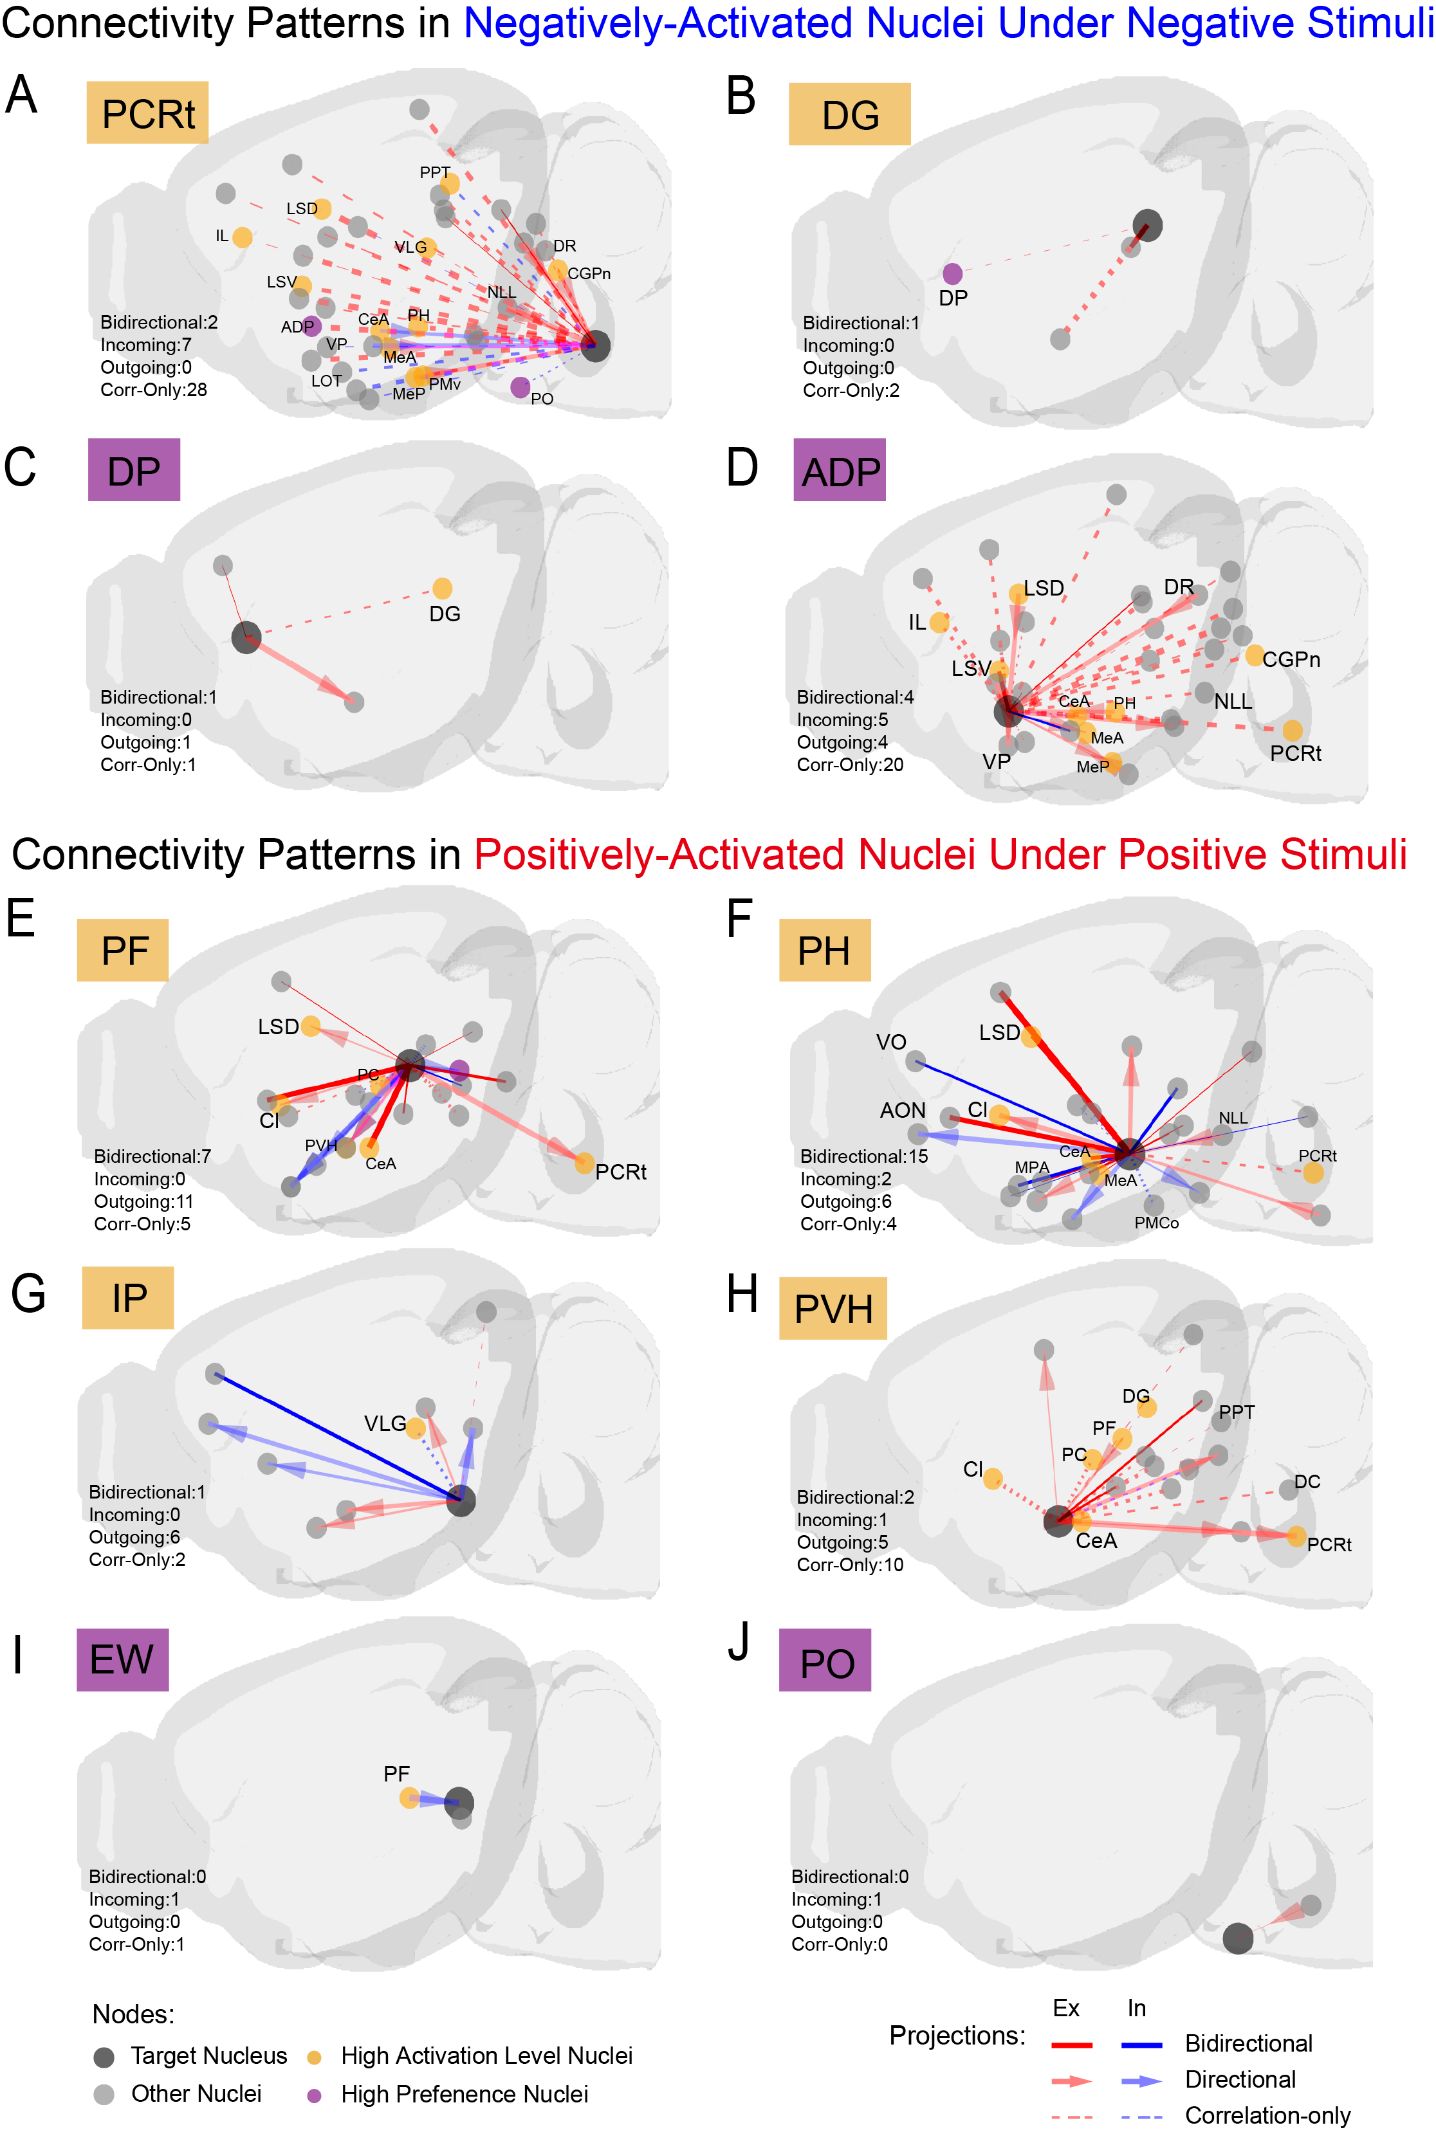


**Supplementary Figure 9. Anatomical projections of condition-specific nuclei under negative and positive emotional stimuli.**

Panels show structural and functional connectivity patterns of high-activation and high-preference nuclei identified under negative (A-D) and positive (E-J) olfactory stimuli.

Solid red and blue lines indicate known bidirectional projections, with red representing positive (excitatory-like) correlations and blue representing negative (inhibitory-like) correlations. Arrows denote unidirectional anatomical projections. Dashed lines indicate correlation-only functional connections without confirmed structural pathways. Node color indicates functional relevance: yellow nodes represent high activation level nuclei, purple nodes indicate high preference nuclei, and gray nodes mark additional anatomically connected targets.

(A-D) Projection profiles of PCRt, DG, DP, and ADP under negative stimuli.

(E-J) Projection profiles of PF, PH, IP, PVH, EW, and PO under positive stimuli.

Quantitative summaries of connection types (bidirectional, incoming, outgoing, correlation-only) are provided in each panel.

**
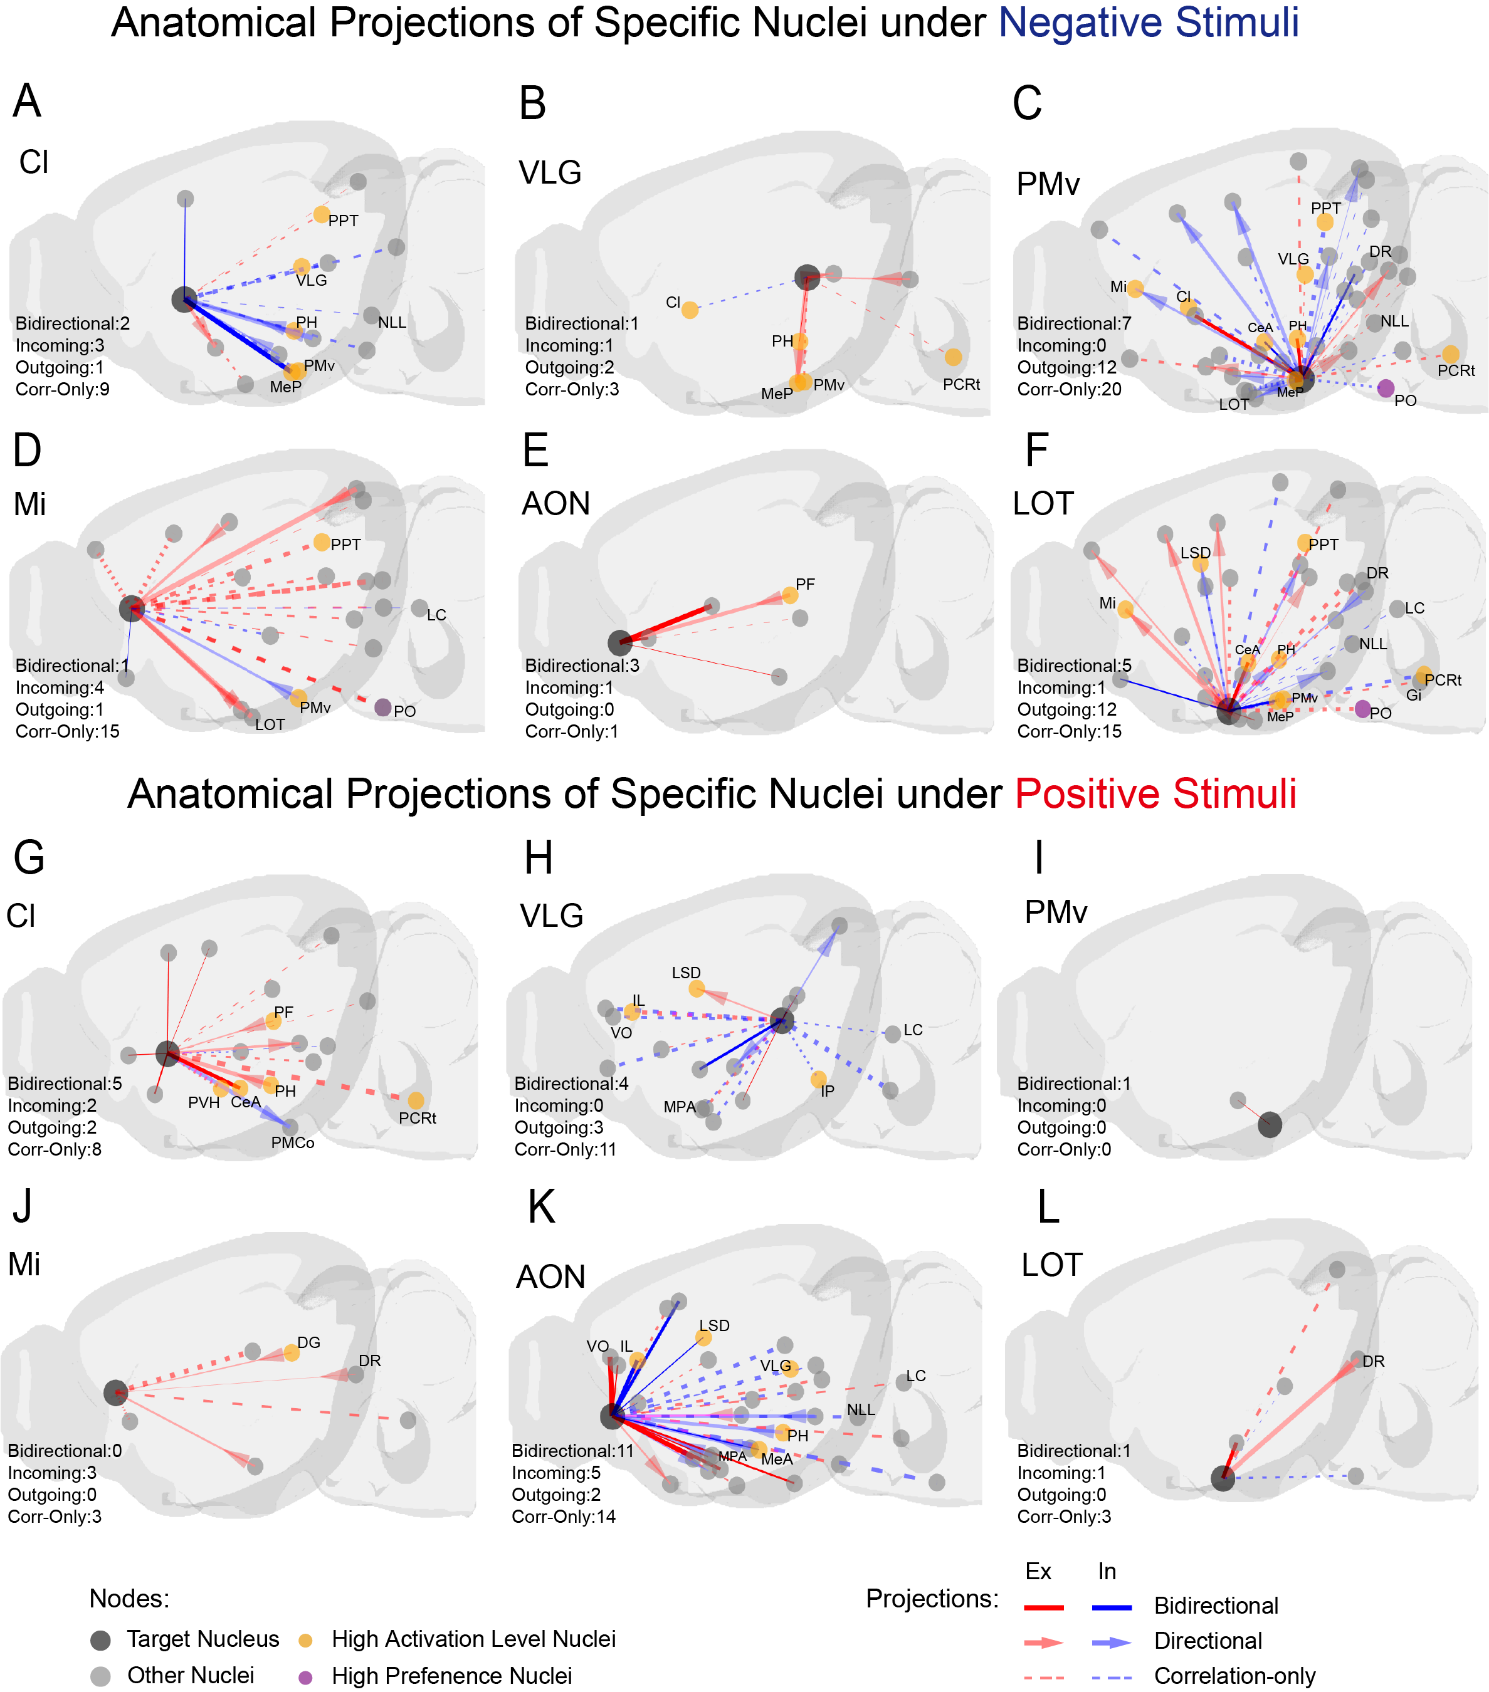
**

**Supplementary Figure 10. Anatomical projections of po-activated and plfactory-related Nuclei under negative and positive olfactory stimuli.**

Panels show the projection profiles of representative emotion-responsive nuclei identified under negative (A-F) and positive (G-L) olfactory conditions, based on integration of functional connectivity and anatomical projection data from the Allen Mouse Brain Connectivity Atlas.

Solid red and blue lines indicate known bidirectional projections, with red representing positive (excitatory-like) correlations and blue representing negative (inhibitory-like) correlations. Arrows denote unidirectional anatomical projections. Dashed lines indicate correlation-only functional connections without confirmed structural pathways. Node color indicates functional relevance: yellow nodes represent high activation level nuclei, purple nodes indicate high preference nuclei, and gray nodes mark additional anatomically connected targets. (A-F) Projection patterns of Cl, VLG, PMv, Mi, AON, and LOT under negative stimuli. (G-L) Projection patterns of the same nuclei under positive stimuli. Quantitative summaries of connection types (bidirectional, incoming, outgoing, correlation-only) are provided in each panel.

**Supplementary Table 1**

| ID | Name | Label | Group |
| --- | --- | --- | --- |
| 1 | GrO | granular cell layer of the olfactory bulb | Olfactory organ |
| 2 | Mi | mitral cell layer of the olfactory bulb | Olfactory organ |
| 3 | AON | anterior olfactory nucleus | Olfactory organ |
| 4 | VTT | ventral tenia tecta | Olfactory organ |
| 5 | DTT | dorsal tenia tecta | Olfactory organ |
| 6 | Tu | olfactory tubercle | Olfactory organ |
| 7 | FrA | frontal association cortex | Cerebral cortex |
| 8 | LO | lateral orbital cortex | Cerebral cortex |
| 9 | VO | ventral orbital cortex | Cerebral cortex |
| 10 | PrL | prelimbic cortex | Cerebral cortex |
| 11 | DLO | dorsolateral orbital cortex | Cerebral cortex |
| 12 | M2 | secondary motor cortex | Cerebral cortex |
| 13 | Pir | piriform cortex | Cerebral cortex |
| 14 | Ict | Insular leaf | Cerebral cortex |
| 15 | M1 | primary motor cortex | Cerebral cortex |
| 16 | DP | Dorsal peduncular area | Cerebral cortex |
| 17 | IL | infralimbic cortex | Cerebral cortex |
| 18 | S1 | primary somatosensory cortex | Cerebral cortex |
| 19 | Cg | cingulate cortex | Cerebral cortex |
| 20 | S2 | secondary somatosensory cortex | Cerebral cortex |
| 21 | Ect | ectorhinal cortex | Cerebral cortex |
| 22 | PRh | perirhinal cortex | Cerebral cortex |
| 23 | Au | primary auditory cortex | Cerebral cortex |
| 24 | TeA | temporal association cortex | Cerebral cortex |
| 25 | PtA | parietal association cortex | Cerebral cortex |
| 26 | V2 | secondary visual cortex | Cerebral cortex |
| 27 | LEnt | lateral entorhinal cortex | Cerebral cortex |
| 28 | V1 | primary visual cortex | Cerebral cortex |
| 29 | RS | retrosplenial cortex | Cerebral cortex |
| 30 | MEnt | medial entorhinal cortex | Cerebral cortex |
| 31 | DG | dentate gyrus | Hippocampus |
| 32 | CA1 | field CA1 of hippocampus | Hippocampus |
| 33 | CA2 | field CA2 of hippocampus | Hippocampus |
| 34 | CA3 | field CA3 of hippocampus | Hippocampus |
| 35 | Py | pyramidal cell layer of the hippocampus | Hippocampus |
| 36 | S | subiculum | Hippocampus |
| 37 | PrS | presubiculum | Hippocampus |
| 38 | PaS | parasubiculum | Hippocampus |
| 39 | EN | endopiriform nucleus | Subcortex |
| 40 | Acb | accumbens nucleus | Subcortex |
| 41 | Cl | claustrum | Subcortex |
| 42 | SL | semilunar nucleus | Subcortex |
| 43 | VP | ventral pallidum | Subcortex |
| 44 | CPu | caudate putamen | Subcortex |
| 45 | LSI | lateral septal nucleus, intermediate part | Subcortex |
| 46 | LSD | lateral septal nucleus, dorsal part | Subcortex |
| 47 | VDB | nucleus of the vertical limb of the diagonal band | Subcortex |
| 48 | LSV | lateral septal nucleus, ventral part | Subcortex |
| 49 | MS | medial septal nucleus | Subcortex |
| 50 | HDB | nucleus of the horizontal limb of the diagonal band | Subcortex |
| 51 | Ld | lambdoid septal zone | Subcortex |
| 52 | BNST | bed nucleus of the stria terminalis | Subcortex |
| 53 | SI | substantia innominata | Subcortex |
| 54 | LOT | nucleus of the lateral olfactory tract | Subcortex |
| 55 | IPAC | interstitial nucleus of the posterior limb  of the anterior commissure | Subcortex |
| 56 | BAOT | bed nucleus of the accessory olfactory tract | Subcortex |
| 57 | AA | anterior amygdaloid area | Amygdaloid body |
| 58 | CxA | cortex-amygdala transition zone | Amygdaloid body |
| 59 | ACo | anterior cortical amygdaloid nucleus | Amygdaloid body |
| 60 | BM | basomedial amygdaloid nucleus | Amygdaloid body |
| 61 | BL | basolateral amygdaloid nucleus | Amygdaloid body |
| 62 | CeA | central amygdaloid nucleus | Amygdaloid body |
| 63 | MeA | medial amygdaloid nucleus, anterior part | Amygdaloid body |
| 64 | PLCo | posterolateral cortical amygdaloid nucleus | Amygdaloid body |
| 65 | MeP | medial amygdaloid nucleus, posterior part | Amygdaloid body |
| 66 | PMCo | posteromedial cortical amygdaloid nucleus | Amygdaloid body |
| 67 | AHi | amygdalohippocampal area | Amygdaloid body |
| 68 | PVT | thalamic paraventricular nucleus | Thalamus |
| 69 | AD | anterodorsal thalamic nucleus | Thalamus |
| 70 | PC | paracentral thalamic nucleus | Thalamus |
| 71 | Re | reuniens thalamic nucleus | Thalamus |
| 72 | CM | central medial thalamic nucleus | Thalamus |
| 73 | Xi | xiphoid thalamic nucleus | Thalamus |
| 74 | IA | interanterior thalamic nucleus | Thalamus |
| 75 | MD | mediodorsal thalamic nucleus | Thalamus |
| 76 | ZI | zona incerta | Thalamus |
| 77 | LHb | lateral habenular nucleus | Thalamus |
| 78 | VM | ventromedial thalamic nucleus | Thalamus |
| 79 | Rh | rhomboid thalamic nucleus | Thalamus |
| 80 | Po | posterior thalamic nuclear group | Thalamus |
| 81 | LPM | lateral posterior thalamic nucleus | Thalamus |
| 82 | VLG | ventral lateral geniculate nucleus | Thalamus |
| 83 | PF | parafascicular thalamic nucleus | Thalamus |
| 84 | SPF | subparafascicular thalamic nucleus | Thalamus |
| 85 | PrC | precommissural nucleus | Thalamus |
| 86 | IGL | intergeniculate leaf | Thalamus |
| 87 | PIL | posterior intralaminar thalamic nucleus | Thalamus |
| 88 | MPA | medial preoptic area | Hypothalamus |
| 89 | LPO | lateral preoptic area | Hypothalamus |
| 90 | MnPO | medial preoptic nucleus | Hypothalamus |
| 91 | MCPO | magnocellular preoptic nucleus | Hypothalamus |
| 92 | ADP | anterodorsal preoptic nucleus | Hypothalamus |
| 93 | SCh | suprachiasmatic nucleus | Hypothalamus |
| 94 | AHA | anterior hypothalamic area | Hypothalamus |
| 95 | LAHN | lateroanterior hypothalamic nucleus | Hypothalamus |
| 96 | PMv | premammillary nucleus, ventral part | Hypothalamus |
| 97 | LH | lateral hypothalamic area | Hypothalamus |
| 98 | PVH | paraventricular hypothalamic nucleus | Hypothalamus |
| 99 | RCh | retrochiasmatic area | Hypothalamus |
| 100 | VMH | ventromedial hypothalamic nucleus | Hypothalamus |
| 101 | Arc | arcuate hypothalamic nucleus | Hypothalamus |
| 102 | DMH | dorsomedial hypothalamic nucleus | Hypothalamus |
| 103 | PH | posterior hypothalamic area | Hypothalamus |
| 104 | SuM | supramammillary nucleus | Hypothalamus |
| 105 | PPT | posterior pretectal nucleus | Midbrain |
| 106 | PAG | periaqueductal gray | Midbrain |
| 107 | PCom | nucleus of the posterior commissure | Midbrain |
| 108 | EW | Edinger-Westphal nucleus | Midbrain |
| 109 | VTA | ventral tegmental area | Midbrain |
| 110 | DpMe | deep mesencephalic nucleus | Midbrain |
| 111 | RPC | red nucleus, parvicellular part | Midbrain |
| 112 | APT | anterior pretectal nucleus | Midbrain |
| 113 | RLi | rostral linear nucleus of the raphe | Midbrain |
| 114 | Op | optic nerve layer of the superior colliculus | Midbrain |
| 115 | SuG | superficial gray layer of the superior colliculus | Midbrain |
| 116 | DpWh | deep white layer of the superior colliculus | Midbrain |
| 117 | IF | interfascicular nucleus | Midbrain |
| 118 | RMC | red nucleus, magnocellular part | Midbrain |
| 119 | SubB | subbrachial nucleus | Midbrain |
| 120 | RRF | retrorubral field | Midbrain |
| 121 | MG | medial geniculate nucleus | Midbrain |
| 122 | DR | dorsal raphe nucleus | Midbrain |
| 123 | MnR | median raphe nucleus | Midbrain |
| 124 | InCo | intercollicular nucleus | Midbrain |
| 125 | IP | interpeduncular nucleus | Midbrain |
| 126 | IC | inferior colliculus | Midbrain |
| 127 | PO | periolivary region | Pons |
| 128 | Pn | pontine nuclei | Pons |
| 129 | PnO | pontine reticular nucleus, oral part | Pons |
| 130 | PPTg | pedunculopontine tegmental nucleus | Pons |
| 131 | RtTg | reticulotegmental nucleus of the pons | Pons |
| 132 | CnF | cuneiform nucleus | Pons |
| 133 | NLL | nucleus of the lateral lemniscus | Pons |
| 134 | VPO | ventral periolivary nucleus | Pons |
| 135 | LDTg | laterodorsal tegmental nucleus | Pons |
| 136 | Su5 | supratrigeminal nucleus | Pons |
| 137 | VC | ventral cochlear nucleus | Pons |
| 138 | PnC | pontine reticular nucleus, caudal part | Pons |
| 139 | RPa | raphe pallidus nucleus | Pons |
| 140 | LC | locus coeruleus | Pons |
| 141 | CGPn | central gray of the pons | Pons |
| 142 | VN | vestibular nucleus | Pons |
| 143 | Sp5 | spinal trigeminal nucleus | Medulla |
| 144 | Gi | gigantocellular reticular nucleus | Medulla |
| 145 | LPGi | lateral paragigantocellular nucleus | Medulla |
| 146 | DC | dorsal cochlear nucleus | Medulla |
| 147 | PCRt | parvicellular reticular nucleus | Medulla |
| 148 | In | intercalated nucleus of the medulla | Medulla |
| 149 | InT | interposed cerebellar nucleus | Cerebellum |
| 150 | Med | medial (fastigial) cerebellar nucleus | Cerebellum |

**Supplementary Table 1. A list of 150 nuclei from 11 brain regions showing varying difference of c-Fos expression**. The table includes the 150 brain regions showing significant c-Fos expression under various stimulus, showing their abbreviations, full names, and the macroscopic brain region they belong to, as referenced from *the Mouse Brain in Stereotaxic Coordinates (2nd edition).*

**Supplementary Table 2**

| Network ID | Functional Network | Description |
| --- | --- | --- |
| N1 | Olfactory Network | Processes olfactory input and links to limbic system. |
| N2 | Limbic Network | Regulates emotion, motivation, reward, and social behavior. |
| N3 | Salience Network | Detects environmental salience and modulates attention. |
| N4 | Executive Control Network | Controls cognitive functions, executive decision-making, and goal-directed behavior. |
| N5 | Default Mode Network | Supports self-referential thinking, mind-wandering, and introspection. |
| N6 | Motor Network | Regulates motor control, movement coordination, balance, and execution. |
| N7 | Memory Network | Involved in learning, spatial navigation, and memory formation. |
| N8 | Sensory Network | Processes sensory inputs from multiple modalities, including touch, vision, audition, and proprioception. |
| N9 | Autonomic Network | Regulates autonomic functions like heart rate, thermoregulation, stress responses, and circadian rhythms. |

**Supplementary Table 2. Functional Annotation of Identified Brain Networks.**

This table summarizes the functional attributes of nine major brain networks identified in the current study, each labeled from N1 to N9. These networks were annotated based on their known roles in sensory processing, emotion regulation, cognitive control, motor coordination, memory, and autonomic functions. Descriptions reflect canonical functions established in previous literature and were used to interpret community structures in the functional network analysis.
