# Supplementary material for: Whole-Brain c-Fos Connectomics Reveals Biphasic Integration-Distribution Architecture in Valence-Specific Emotional Processing
Source: Research Square preprint supplement (doi:10.21203/rs.3.rs-7794939/v1), 2025-11-14
Supplement: Supplementary file 2 [file e4eab9e615174a3cb75180f0.xlsx]

## Sheet: Sheet1
Name	Group	GroupID	ctl_1	ctl_2	ctl_3	ctl_4	ctl_5	mmu_1	mmu_2	mmu_3	mmu_4	mmu_5	fmu_1	fmu_2	fmu_3	fmu_4	fmu_5	ru_1	ru_2	ru_3	ru_4	ru_5	tmt_1	tmt_2	tmt_3	tmt_4	tmt_5
GrO	Olfactory organ	1	2162	2152	2565	2203	2085	6720	6398	7152	7615	7234	6338	5545	7736	5493	5200	4358	4893	5348	6131	5495	4934	5041	3744	5694	4173
Mi	Olfactory organ	1	319	200	242	236	273	1440	1323	1537	1465	1752	1432	1278	1648	1336	1208	2086	2030	2313	1768	2219	1464	1510	1352	1802	1364
AON	Olfactory organ	1	1028	847	1040	1060	824	1760	1586	2192	1766	2226	3700	3845	3179	3685	4015	2304	2065	2187	2778	2380	2158	2181	1930	2774	1963
VTT	Olfactory organ	1	116	137	134	121	133	294	270	447	464	310	524	428	354	438	454	352	222	351	248	359	688	664	670	508	510
DTT	Olfactory organ	1	294	346	269	321	312	618	539	680	672	612	368	478	552	484	508	518	422	642	562	488	664	701	678	398	708
Tu	Olfactory organ	1	460	581	555	537	519	646	548	768	826	986	1378	1242	918	1248	924	1030	1386	1581	1453	1541	1108	1148	1020	1428	1172
FrA	Cerebral cortex	2	252	326	246	334	252	474	278	636	461	616	410	813	604	411	409	765	578	789	679	675	282	337	334	574	256
LO	Cerebral cortex	2	231	275	263	284	260	384	426	438	502	454	598	522	510	511	529	403	425	486	360	398	432	368	394	402	350
VO	Cerebral cortex	2	135	108	146	91	140	238	284	335	412	386	678	625	590	628	613	517	379	514	240	495	360	416	267	426	355
PrL	Cerebral cortex	2	540	681	496	651	592	1592	1240	1405	1461	1264	1208	1448	1032	1021	1179	905	965	1001	1005	1017	1088	1131	979	1163	1012
DLO	Cerebral cortex	2	306	498	294	512	342	382	329	294	409	318	182	582	333	190	200	534	368	435	388	454	416	446	438	491	556
M2	Cerebral cortex	2	2468	2116	2434	2564	2323	3596	2951	3421	3681	3772	3740	4950	3184	4970	4249	3244	3692	3250	2944	3483	2760	2548	3206	3116	2456
Pir	Cerebral cortex	2	4366	3848	4174	3661	3279	7090	6959	7572	7749	8116	7544	8571	8804	9016	8226	8277	6623	6810	5486	7493	7218	7433	5350	8744	6308
ICt	Cerebral cortex	2	1625	1275	1458	1635	1388	4450	4149	4517	5412	5054	2836	4388	2762	2253	3499	2771	3818	4139	3103	3601	3380	2698	3032	3082	3451
M1	Cerebral cortex	2	2942	2007	2945	3045	2815	2214	1959	2852	2288	3190	2956	4791	3004	4837	4120	3761	4546	4316	3877	4135	2760	2901	2408	3315	2444
DP	Cerebral cortex	2	360	553	393	400	595	526	668	520	575	526	336	442	642	335	602	674	870	952	982	958	892	982	850	1059	979
IL	Cerebral cortex	2	136	83	101	168	152	1082	905	769	752	820	532	548	466	502	263	450	501	568	509	451	552	617	608	769	535
S1	Cerebral cortex	2	2291	1934	2036	1827	1619	4028	3820	4653	4168	5096	3486	2870	3151	4102	2857	5986	4292	6192	4673	4810	3340	4068	2494	3229	2820
Cg	Cerebral cortex	2	1511	1612	1884	1630	1478	3782	3180	3945	4131	3498	2746	2143	2434	2789	2142	2013	2096	2050	1949	2126	2864	2374	1980	2971	2258
S2	Cerebral cortex	2	1137	933	959	844	833	2014	1720	2389	2052	2730	2016	2238	1892	2368	1648	2536	2198	2864	2257	2218	2674	2248	2568	2780	2206
Ect	Cerebral cortex	2	644	579	684	691	623	1004	946	1491	1060	1782	1026	1095	894	1030	1003	738	1237	1459	1421	1340	878	1063	910	1160	1233
PRh	Cerebral cortex	2	1100	817	869	741	973	1364	1300	1849	1880	1702	1208	1365	1480	1219	1468	1074	1008	1271	1088	1267	1296	1384	1243	1422	1168
Au	Cerebral cortex	2	1898	1700	1776	1949	1623	1480	1620	2003	1519	2010	2142	2155	2056	1724	1709	1943	1601	1652	2391	1961	2156	2440	1940	2880	1963
TeA	Cerebral cortex	2	1410	616	1043	573	776	730	675	956	1043	1200	736	893	1062	887	1087	894	999	1029	1014	1020	718	765	656	921	838
PtA	Cerebral cortex	2	602	436	598	424	452	770	636	815	802	880	694	862	696	728	585	558	585	603	663	626	754	845	803	962	836
V2	Cerebral cortex	2	1596	1096	1191	1001	1394	2452	2270	2969	3021	2540	3384	2520	2402	2436	2088	2226	2076	2668	1819	2221	1950	2016	1941	2033	2080
LEnt	Cerebral cortex	2	1118	1017	1135	1194	1176	2076	2190	1414	1455	1430	1684	1878	2095	2906	1783	1346	1762	1800	1532	1652	1616	1383	1514	2016	1775
V1	Cerebral cortex	2	2206	2725	2596	2653	2247	3032	2736	3501	3588	3126	3294	3285	3742	3321	4095	3131	2886	3637	2704	3309	2286	2350	2113	2963	2480
RS	Cerebral cortex	2	634	746	662	880	742	1766	1674	2555	1608	1874	1362	1776	1902	1094	1654	560	1710	1833	1468	1698	1152	830	1644	1126	1438
MEnt	Cerebral cortex	2	250	256	260	187	229	618	547	569	660	586	812	712	1330	687	679	584	518	567	409	529	366	386	358	554	463
DG	Hippocampal	3	216	197	233	246	164	730	611	807	776	868	458	597	778	475	450	991	1073	1241	1133	1203	1216	1346	935	1292	1334
CA1	Hippocampal	3	164	164	258	228	120	648	577	581	639	606	682	380	520	515	423	322	294	264	458	347	562	672	363	594	603
CA2	Hippocampal	3	92	216	166	158	185	512	444	404	542	464	340	260	368	367	236	378	252	334	448	394	644	537	421	406	419
CA3	Hippocampal	3	362	409	426	456	332	970	804	729	830	808	1062	1191	818	849	1198	965	949	1156	1070	990	1756	1887	866	1401	1501
Py	Hippocampal	3	268	206	288	244	310	586	466	450	460	544	612	522	832	828	866	982	1001	772	894	769	1092	925	810	1067	826
S	Hippocampal	3	163	308	186	271	308	612	658	763	605	704	576	616	446	572	566	556	667	691	693	792	640	638	518	649	498
PrS	Hippocampal	3	88	68	90	73	117	178	191	201	226	274	238	435	196	182	194	280	279	292	236	297	160	185	157	226	231
PaS	Hippocampal	3	116	74	70	59	47	194	219	215	243	272	116	152	244	186	174	218	227	232	138	248	140	142	123	192	115
EN	Subcortical tissue	4	743	865	765	847	734	2224	1852	1562	1768	1602	2420	1429	2312	2493	2534	1438	1464	1927	1845	1791	1732	1914	1713	1975	2209
Acb	Subcortical tissue	4	622	625	599	704	542	1346	1043	1652	1380	1522	1190	890	832	1190	1021	960	1157	1190	1994	1002	1468	1658	1111	1705	1035
Cl	Subcortical tissue	4	88	102	123	92	80	588	622	847	914	904	453	302	466	524	662	651	707	700	807	717	394	713	585	453	489
SL	Subcortical tissue	4	26	26	25	13	28	88	54	58	84	54	108	62	80	104	98	36	39	46	47	49	56	71	61	52	34
VP	Subcortical tissue	4	134	189	131	154	136	450	469	339	400	346	288	306	224	442	316	358	233	375	228	342	604	673	509	899	565
CPu	Subcortical tissue	4	1766	1804	1862	2080	1880	2082	1955	2346	2461	2070	2142	3682	3380	3464	2986	2190	2321	2168	2877	2547	2236	2361	1993	2818	2232
LSI	Subcortical tissue	4	210	236	248	257	236	800	531	752	845	678	516	420	735	399	882	952	699	746	926	944	1190	1282	860	1516	1188
LSD	Subcortical tissue	4	38	183	55	74	74	798	756	833	815	732	466	582	340	448	602	313	365	410	520	309	620	691	513	793	562
VDB	Subcortical tissue	4	197	211	197	189	218	244	306	223	172	222	316	282	352	277	365	332	317	328	328	338	330	344	324	480	241
LSV	Subcortical tissue	4	32	200	57	108	55	852	602	1048	905	860	638	722	806	662	598	756	828	903	955	730	1160	1158	821	1411	1162
MS	Subcortical tissue	4	188	251	247	212	233	508	367	579	522	598	442	538	338	406	360	416	432	392	362	409	666	719	646	856	654
HDB	Subcortical tissue	4	196	145	219	228	190	284	309	160	150	192	240	299	322	286	372	262	226	185	241	249	168	191	176	219	162
Ld	Subcortical tissue	4	24	24	31	38	43	42	28	24	45	34	72	108	134	116	84	42	42	44	68	46	68	66	74	96	58
BNST	Subcortical tissue	4	447	441	452	499	385	844	796	962	1008	766	1208	996	1444	1014	1426	1259	1498	1154	1456	1372	1520	1556	1388	1808	1349
SI	Subcortical tissue	4	86	109	77	112	95	112	117	124	122	156	182	199	204	177	162	106	128	137	134	125	116	133	109	198	129
LOT	Subcortical tissue	4	48	10	36	77	48	58	62	106	58	144	94	102	168	108	92	351	364	405	185	335	80	90	77	95	125
IPAC	Subcortical tissue	4	74	96	102	73	73	132	110	116	108	98	150	108	146	153	133	166	176	190	182	144	100	128	105	82	74
BAOT	Subcortical tissue	4	24	12	18	22	17	12	34	26	16	12	22	38	16	38	18	66	60	56	44	52	42	30	38	56	60
AA	Amygdaloid body	5	90	71	97	87	47	168	125	142	181	130	226	220	232	235	243	248	188	430	336	402	176	68	102	48	186
CxA	Amygdaloid body	5	184	239	216	208	210	800	771	799	860	824	770	783	854	839	762	772	677	780	476	660	540	632	442	548	638
ACo	Amygdaloid body	5	558	417	448	613	371	1238	1321	967	1304	1038	1276	883	1424	1264	1184	1330	1359	1480	997	1360	780	827	913	1064	906
BM	Amygdaloid body	5	202	225	136	209	179	886	696	713	764	908	520	747	840	736	834	742	669	1012	1125	753	880	915	804	992	868
BL	Amygdaloid body	5	338	380	349	411	306	362	423	657	747	682	640	1046	598	680	762	366	486	666	759	404	416	400	274	648	288
CeA	Amygdaloid body	5	72	104	77	83	92	688	530	894	975	938	572	438	526	508	449	850	918	803	696	890	640	568	464	382	572
MeA	Amygdaloid body	5	68	140	121	79	77	748	553	453	765	464	430	390	366	377	370	495	516	472	606	498	576	638	482	792	503
PLCo	Amygdaloid body	5	260	552	350	528	283	434	471	587	609	590	600	781	864	842	851	314	327	430	422	447	460	475	477	759	602
MeP	Amygdaloid body	5	58	78	76	66	72	466	516	477	472	510	802	531	714	533	532	490	493	363	389	482	1124	785	989	1188	902
PMCo	Amygdaloid body	5	202	247	204	222	229	918	739	683	692	702	934	1335	932	977	918	363	365	440	271	456	404	463	378	643	519
AHi	Amygdaloid body	5	272	316	256	294	258	420	304	535	487	688	506	378	594	529	542	370	395	437	410	389	552	625	596	686	435
PVT	Thalamus	6	604	947	632	853	675	2130	1658	2823	2900	2554	1806	2501	2714	2801	2532	2676	2915	3196	2334	3341	3320	2471	2326	3196	2538
AD	Thalamus	6	18	22	16	8	14	26	32	34	22	25	12	52	28	26	18	34	46	63	32	35	26	20	13	20	21
PC	Thalamus	6	24	34	31	36	30	132	153	212	247	230	132	140	162	144	86	108	116	147	85	146	136	149	118	186	115
Re	Thalamus	6	164	218	184	185	172	228	205	231	266	222	500	377	514	489	365	614	489	514	482	498	498	726	695	761	771
CM	Thalamus	6	300	527	444	387	491	1016	999	790	818	826	730	706	828	858	706	1172	1286	941	1402	1309	1226	1639	1385	1534	1816
Xi	Thalamus	6	40	40	39	36	53	72	158	77	91	84	96	106	88	125	99	142	194	180	188	177	172	148	166	180	162
IA	Thalamus	6	58	40	58	65	67	298	173	204	155	210	328	324	352	236	349	148	144	86	112	99	224	240	206	90	156
MD	Thalamus	6	162	179	149	212	186	406	342	446	420	398	358	404	366	429	427	386	428	400	362	350	400	402	284	268	288
ZI	Thalamus	6	499	456	404	396	742	958	863	1087	998	1414	818	794	566	911	682	1192	803	1084	985	790	1156	1255	1034	1292	901
LHb	Thalamus	6	80	70	108	96	103	204	288	376	284	426	200	154	406	152	145	364	389	417	278	361	320	357	317	461	480
VM	Thalamus	6	124	146	119	122	134	208	254	242	284	128	212	202	200	234	183	300	396	236	382	304	510	530	378	337	492
Rh	Thalamus	6	60	64	55	51	68	118	128	83	102	100	158	199	234	161	194	184	117	143	150	157	144	145	106	241	238
Po	Thalamus	6	36	38	52	46	48	82	79	86	70	92	78	84	118	132	76	72	104	74	110	98	64	78	58	84	55
LPM	Thalamus	6	12	8	16	10	12	14	12	22	18	16	12	8	16	14	18	10	8	12	14	17	14	17	16	16	23
VLG	Thalamus	6	122	160	98	105	142	1474	1386	1267	1311	1314	652	1159	862	875	666	1249	854	858	947	981	1452	1057	1436	1598	1066
PF	Thalamus	6	38	34	24	36	21	180	207	259	282	268	180	196	140	154	158	78	85	88	110	88	68	76	63	97	62
SPF	Thalamus	6	28	34	23	38	20	74	86	48	83	42	38	34	34	42	35	146	116	123	135	140	116	117	109	224	41
PrC	Thalamus	6	26	30	30	40	35	68	69	68	38	62	72	60	58	61	48	134	142	139	110	145	180	187	88	201	92
IGL	Thalamus	6	36	42	43	58	36	766	604	376	383	412	462	388	254	307	269	276	432	458	390	257	360	370	207	474	375
PIL	Thalamus	6	60	107	55	96	76	138	142	206	178	100	264	317	248	235	253	264	206	213	190	215	190	252	180	262	190
MPA	Hypothalamus	7	140	82	93	158	121	708	745	455	761	558	362	408	339	406	289	419	516	426	459	504	568	485	346	749	366
LPO	Hypothalamus	7	266	358	362	290	338	482	518	536	592	468	664	646	730	662	651	580	538	628	506	462	582	621	584	772	547
MnPO	Hypothalamus	7	48	58	45	71	57	72	108	112	96	98	58	102	74	88	52	81	102	54	52	32	92	71	108	127	108
MCPO	Hypothalamus	7	30	31	33	46	38	100	111	88	120	84	60	72	58	82	80	102	99	101	40	103	56	82	55	76	71
ADP	Hypothalamus	7	112	131	114	136	105	90	119	136	94	172	140	134	122	130	151	190	214	246	205	194	396	432	279	533	301
SCh	Hypothalamus	7	100	82	117	81	86	136	144	168	160	128	132	108	160	94	162	174	146	128	138	188	156	146	88	222	170
AHA	Hypothalamus	7	194	252	171	231	212	484	460	501	521	642	634	630	834	470	603	653	660	717	677	753	460	488	590	528	642
AHN	Hypothalamus	7	70	43	85	66	72	192	211	142	191	146	68	90	124	81	129	126	164	198	118	120	272	146	68	282	257
PMv	Hypothalamus	7	32	66	32	56	28	274	186	108	294	188	152	114	290	232	148	156	160	122	152	166	288	230	276	276	264
LH	Hypothalamus	7	653	548	528	702	567	1778	1905	1663	1845	1690	1600	1626	1982	1839	1617	1954	2207	2371	1852	1923	2304	1705	2181	2735	2226
PVH	Hypothalamus	7	94	110	105	146	172	554	494	707	761	870	458	487	540	526	543	287	294	281	179	293	264	383	255	387	250
RCh	Hypothalamus	7	44	26	54	56	50	26	55	60	32	40	78	82	52	69	65	72	46	70	58	77	26	68	47	36	38
VMH	Hypothalamus	7	150	257	158	205	197	266	222	355	408	402	280	419	224	406	400	858	618	829	504	904	782	828	690	978	769
Arc	Hypothalamus	7	110	100	85	119	73	98	46	338	107	380	272	185	160	280	277	218	224	249	122	215	216	222	160	140	171
DMH	Hypothalamus	7	202	236	213	232	213	510	405	595	531	604	292	405	678	302	296	448	584	620	601	632	1124	891	732	1175	1403
PH	Hypothalamus	7	36	269	62	154	167	840	757	836	997	844	472	405	586	610	585	487	505	534	557	573	828	678	656	820	663
SuM	Hypothalamus	7	44	108	51	86	86	122	144	183	135	194	116	305	232	117	113	299	159	147	160	157	532	224	359	306	465
InT	Cerebelum	8	18	30	24	14	24	36	24	32	20	18	46	24	38	42	20	12	36	20	18	22	18	46	28	40	16
Med	Cerebelum	8	36	42	28	44	18	34	62	46	35	50	62	56	54	50	39	38	46	39	60	48	42	90	52	30	54
PPT	Midbrain	9	12	12	22	17	15	96	115	89	92	96	114	82	108	96	72	164	172	192	157	201	84	132	101	115	103
PAG	Midbrain	9	586	1195	599	975	792	1804	1940	2735	2353	2664	1030	2096	1910	1660	1900	1826	1964	2103	1905	2255	2478	2695	2159	2712	2195
PCom	Midbrain	9	40	42	24	47	36	126	139	72	206	72	104	84	98	84	80	48	63	74	49	78	82	106	79	111	142
EW	Midbrain	9	88	34	58	58	40	246	138	90	92	106	164	125	216	174	153	40	56	72	68	36	32	62	34	62	72
VTA	Midbrain	9	154	136	131	70	121	322	467	379	363	400	228	206	232	200	242	530	454	553	479	537	496	504	675	692	506
DpMe	Midbrain	9	120	118	110	139	105	260	275	299	270	322	208	346	232	206	207	336	408	420	532	388	220	231	156	308	221
RPC	Midbrain	9	48	42	77	38	58	134	138	44	55	54	54	86	68	60	72	184	166	206	252	208	96	124	106	157	125
APT	Midbrain	9	118	146	98	140	107	204	226	166	237	180	108	156	92	176	144	264	280	304	278	274	344	371	258	426	265
RLi	Midbrain	9	90	101	88	80	94	288	248	322	302	244	356	209	414	343	178	374	286	309	302	313	280	305	250	330	346
Op	Midbrain	9	78	66	90	84	104	198	207	333	351	342	196	154	306	298	287	248	273	262	468	325	224	240	211	128	215
SuG	Midbrain	9	518	544	462	520	523	808	780	937	738	1266	1330	892	1498	1182	1352	1452	1339	1511	1542	1245	996	861	1102	1293	960
DpWh	Midbrain	9	44	40	60	54	36	42	44	55	42	60	56	129	50	49	44	64	40	52	54	50	36	28	21	34	38
IF	Midbrain	9	24	32	18	26	35	42	51	68	88	76	36	42	44	62	38	34	52	36	28	52	37	42	31	42	30
RMC	Midbrain	9	30	36	24	38	38	132	149	41	53	60	166	75	192	147	84	162	108	113	112	123	112	141	135	147	150
SubB	Midbrain	9	170	154	138	129	117	236	263	436	258	456	238	346	448	206	268	230	145	141	132	137	154	162	86	244	176
RRF	Midbrain	9	18	22	20	24	31	60	67	24	19	28	52	60	46	38	42	78	55	85	51	83	40	57	54	45	40
MG	Midbrain	9	32	24	41	33	40	56	64	68	61	42	46	18	32	48	26	44	50	50	28	44	72	46	60	83	52
DR	Midbrain	9	138	155	131	156	136	528	421	662	576	694	508	569	890	481	466	360	413	452	433	451	808	831	617	1003	620
MnR	Midbrain	9	100	98	102	139	106	416	355	247	452	256	144	285	322	295	290	424	348	472	277	372	624	618	489	669	499
InCo	Midbrain	9	78	82	89	77	91	186	92	143	167	188	146	133	160	145	98	104	158	160	88	113	160	202	197	237	128
IP	Midbrain	9	32	26	34	52	44	118	153	159	151	162	310	43	306	347	313	102	97	143	70	98	138	88	142	94	150
IC	Midbrain	9	432	168	295	401	194	1992	1713	2291	1719	2328	2020	798	2442	2460	1461	1494	1214	1357	1788	1385	1416	1144	918	1313	1016
PO	Pons	10	194	38	157	46	240	480	506	503	510	532	78	543	1278	441	600	140	101	137	100	149	64	73	63	79	78
Pn	Pons	10	1860	2023	1584	2010	1870	2556	2078	2410	2476	2676	3450	4434	3834	4632	3368	2460	2837	2770	2054	2700	2766	2410	2201	2813	2046
PnO	Pons	10	48	90	52	82	49	122	135	306	337	308	298	286	301	323	325	182	304	338	181	345	228	167	166	226	166
PPTg	Pons	10	98	82	83	81	106	234	255	366	406	436	230	329	287	207	310	176	186	213	85	208	272	303	203	384	186
RtTg	Pons	10	488	475	449	462	447	474	672	628	724	866	532	1016	1010	610	963	926	733	815	777	811	1232	860	835	994	874
CnF	Pons	10	86	104	62	111	96	172	180	237	260	228	192	108	194	138	122	130	158	204	134	162	276	223	200	362	265
NLL	Pons	10	72	56	48	36	50	288	264	227	258	248	206	170	198	222	206	188	104	176	208	116	314	258	210	398	320
VPO	Pons	10	58	52	50	57	59	148	168	100	159	104	152	166	102	142	136	264	179	295	192	288	188	196	126	194	119
LDTg	Pons	10	58	78	50	74	67	154	126	244	167	180	156	188	208	140	162	126	154	157	142	113	202	191	254	284	164
Su5	Pons	10	32	38	42	36	24	42	52	38	62	40	38	52	37	46	62	106	70	68	58	86	48	72	46	101	62
VC	Pons	10	194	114	162	148	157	254	198	428	301	426	822	502	752	499	759	660	398	650	435	670	370	430	354	392	516
PnC	Pons	10	50	60	68	52	42	178	138	269	204	252	116	154	155	227	131	324	180	226	266	186	128	127	113	149	118
RPa	Pons	10	110	74	111	49	116	98	117	83	100	102	88	104	122	165	148	114	126	155	124	157	118	111	92	148	146
LC	Pons	10	7	10	0	8	12	16	20	22	28	24	30	34	40	32	38	18	22	10	29	19	22	28	26	30	33
CGPn	Pons	10	10	8	14	12	8	68	82	66	79	94	124	106	97	78	100	68	72	66	84	72	88	102	68	132	95
VN	Pons	10	454	250	337	323	269	762	884	762	942	685	1356	1206	1406	1078	948	942	688	946	724	638	940	1045	880	998	1189
Sp5	Medulla	11	16	13	15	28	7	84	106	134	212	178	26	147	216	28	37	104	75	66	78	67	48	59	84	96	88
Gi	Medulla	11	240	242	321	396	252	714	652	647	650	680	604	536	1242	810	1012	1785	1467	1921	1045	1355	950	837	641	1056	1526
LPGi	Medulla	11	180	86	107	164	139	416	487	286	454	326	226	124	166	242	186	270	303	326	265	266	312	301	213	384	222
DC	Medulla	11	130	194	107	156	99	468	334	613	499	620	420	381	528	361	427	250	268	304	346	198	312	401	286	445	476
PCRt	Medulla	11	110	176	99	153	150	576	530	719	735	898	464	372	414	362	490	648	558	488	686	521	924	935	765	1085	791
In	Medulla	11	76	96	77	78	97	98	110	146	155	148	98	327	172	96	155	174	166	184	88	132	220	232	211	234	127
